1 **Recurrent stroke prediction by applying a stroke polygenic risk score in the Japanese**  
2 **population**

3

4 Naoki Kojima (MSc)<sup>1</sup>, Masaru Koido (PhD)<sup>1</sup>, Yunye He (PhD)<sup>1</sup>, Yuka Shimmori (MSc)<sup>1</sup>,  
5 Tsuyoshi Hachiya (PhD)<sup>1</sup>, BioBank Japan, Stéphanie Debette (MD, PhD)<sup>2,3</sup>, Yoichiro  
6 Kamatani (MD, PhD)<sup>1</sup>

7

8 1. Laboratory of Complex Trait Genomics, Department of Computational Biology and  
9 Medical Sciences, Graduate School of Frontier Sciences, The University of Tokyo,  
10 Tokyo, Japan.

11 2. Bordeaux Population Health Research Center, University of Bordeaux, Inserm, UMR  
12 1219, Bordeaux, France.

13 3. Department of Neurology, Institute for Neurodegenerative Diseases, CHU de Bordeaux,  
14 Bordeaux, France.

15

16 **Short title:** Recurrent stroke prediction by PRS

17

18 **Corresponding author:**

19 Yoichiro Kamatani<sup>1</sup>

20 Address: 4-6-1 Shirokanedai, Minato-ku, Tokyo 108-8639 Japan

21 Email: [kamatani.yoichiro@edu.k.u-tokyo.ac.jp](mailto:kamatani.yoichiro@edu.k.u-tokyo.ac.jp)

22

23 **Total word count of the manuscript (including Title Page, Abstract, Text, References,**  
24 **Tables, and Figures Legends): 6306**

25

NOTE: This preprint reports new research that has not been certified by peer review and should not be used to guide clinical practice.

26

27 **Abstract**

28 **Background**

29 Recently, various polygenic risk score (PRS)-based methods were developed to improve  
30 stroke prediction. However, current PRSs (including cross-ancestry PRS) poorly predict  
31 recurrent stroke. Here, we aimed to determine whether the best PRS for Japanese individuals  
32 can also predict stroke recurrence in this population by extensively comparing the methods  
33 and maximizing the predictive performance for stroke onset.

34

35 **Methods**

36 We used data from the BioBank Japan (BBJ) 1<sup>st</sup> cohort (n=179,938) to derive and optimize  
37 the PRSs using a 10-fold cross-validation. We integrated the optimized PRSs for multiple  
38 traits, such as vascular risk factors and stroke subtypes to generate a single PRS using the  
39 meta-scoring approach (metaGRS). We used an independent BBJ 2<sup>nd</sup> cohort (n=41,929) as a  
40 test sample to evaluate the association of the metaGRS with stroke and recurrent stroke.

41

42 **Results**

43 We analyzed recurrent stroke cases (n=174) and non-recurrent stroke controls (n=1,153)  
44 among subjects within the BBJ 2<sup>nd</sup> cohort. After adjusting for known risk factors, metaGRS  
45 was associated with stroke recurrence (adjusted OR per SD 1.18 [95% CI: 1.00–1.39,  
46 p=0.044]), although no significant correlation was observed with the published PRSs. We  
47 administered three distinct tests to consider the potential index event bias; however, the  
48 outcomes derived from these examinations did not provide any significant indication of the  
49 influence of index event bias. The high metaGRS group without a history of hypertension  
50 had a higher risk of stroke recurrence than that of the low metaGRS group (adjusted OR 2.24  
51 [95% CI: 1.07–4.66, p=0.032]). However, this association was weak in the hypertension

52 group (adjusted OR 1.21 [95% CI: 0.69–2.13, p=0.50]).

53

#### 54 **Conclusions**

55 The metaGRS developed in a Japanese cohort predicted stroke recurrence in an independent

56 cohort of patients. In particular, it predicted an increased risk of recurrence among stroke

57 patients without hypertension. These findings provide clues for additional genetic risk

58 stratification and help in developing personalized strategies for stroke recurrence prevention.

59

60 **Keywords:** recurrent stroke, stroke, polygenic risk score, LDpred2, risk factor, index event

61 bias, hypertension, metaGRS

62 **Non-standard abbreviations and acronyms**

|    |       |                               |
|----|-------|-------------------------------|
| 63 | PRS   | polygenic risk score          |
| 64 | P+T   | pruning and thresholding      |
| 65 | BBJ   | BioBank Japan                 |
| 66 | BBJ1  | BBJ 1 <sup>st</sup> cohort    |
| 67 | BBJ2  | BBJ 2 <sup>nd</sup> cohort    |
| 68 | ToMMo | Tohoku Medical Megabank       |
| 69 | AIS   | all ischemic stroke           |
| 70 | IPW   | inverse probability weighting |
| 71 | LD    | linkage disequilibrium        |
| 72 | GWAS  | genome-wide association study |
| 73 | PC    | principal component           |
| 74 | IPW   | inverse probability weight    |
| 75 | AUC   | area under the curve          |
| 76 | LAS   | large artery stroke           |
| 77 | SVS   | small vessel stroke           |
| 78 | CES   | cardioembolic stroke          |
| 79 | TIS   | transient ischemic attack     |
| 80 | HWE   | Hardy-Weinberg equilibrium    |
| 81 | WGS   | whole genome sequencing       |
| 82 | MI    | myocardial infarction         |
| 83 | SAP   | stable angina pectoris        |
| 84 | AP    | unstable angina pectoris      |
| 85 | AF    | atrial fibrillation           |
| 86 | DM    | diabetes mellitus             |

|    |     |                          |
|----|-----|--------------------------|
| 87 | SM  | smoking                  |
| 88 | BMI | body mass index          |
| 89 | HE  | height                   |
| 90 | SBP | systolic blood pressure  |
| 91 | DBP | diastolic blood pressure |
| 92 | TC  | total cholesterol        |
| 93 | TG  | triglyceride             |
| 94 | HDL | high-density lipoprotein |
| 95 | LDL | low-density lipoprotein  |
| 96 |     |                          |

## 97 Introduction

98

99 Stroke is a major cause of mortality in Japan, with 56,000 deaths reported in 2020.<sup>1</sup> The  
100 conventional risk factors for stroke include hypertension, high waist-to-hip ratio, smoking,  
101 cardiac causes, dyslipidemia, and diabetes mellitus.<sup>2</sup> In Japan, the stroke recurrence rate is up  
102 to 30–50% during 5-10 years of follow-up after the first stroke.<sup>3,4</sup> Accordingly, it will be  
103 medically beneficial to stratify high-risk groups for recurrent stroke among those who have  
104 experienced a stroke to potentially generate more intensive secondary prevention strategies  
105 than current recommendations.

106 Genome-wide association studies (GWAS) have identified many disease-susceptibility  
107 variants associated with complex traits.<sup>5</sup> A polygenic risk score (PRS) is the weighted  
108 summation of the individual genetic effects of these variants. Its weighting strategy varies  
109 depending on the construction method; traditionally, only significant variants are used in  
110 developing this score. The recently developed PRS methods involve non-significant variants  
111 and updated effect weights and consider the linkage disequilibrium (LD) structure. The  
112 development of PRS methods has helped stratify high-risk groups for complex traits,<sup>6–11</sup>  
113 including stroke.<sup>12</sup>

114 Polygenic risk scores developed using the 32 genome-wide significant ( $p < 5.0 \times 10^{-8}$ ) variants  
115 or 90 marginally associated ( $p < 1.0 \times 10^{-5}$ ) variants (PRS<sub>90</sub>) from the MEGASTROKE study<sup>12</sup>  
116 are associated with stroke onset in subjects of European ancestry.<sup>12,13</sup> The meta-scoring PRS  
117 approach (metaGRS) includes 3.2 million variants by combining PRSs for stroke subtypes,  
118 risk factors, and comorbidities by adjusting the effect weight via elastic-net logistic  
119 regression; this approach has an improved predictive performance for stroke compared to  
120 that of PRS<sub>90</sub>.<sup>14</sup> MetaGRS can predict stroke incidence independent of environmental factors  
121 and could help motivate individuals with high genetic risk to make lifestyle changes for

122 stroke prevention (although not yet implemented in clinical practice outside a research  
123 setting).<sup>15</sup> The PRS shows reduced transferability between populations. Additionally, a PRS  
124 developed using various variants derived from Japanese GWAS successfully predicted stroke  
125 onset in the Japanese population.<sup>16,17</sup> Most recently, the GIGASTROKE study proposed an  
126 integrated PRS approach among PRSs derived from populations of multiple ancestries using  
127 the metaGRS framework (iPGS), which showed a better predictive ability than the  
128 MEGASTROKE European or East Asian PRS.<sup>18</sup> However, the PRS did not successfully  
129 predict stroke recurrence; for example, PRS<sub>32</sub> and iPGS did not significantly predict stroke  
130 recurrence after adjusting for clinical comorbidities, with notably smaller effect sizes than for  
131 non-recurrent stroke.<sup>12,18</sup> Furthermore, the potential effect of index event (also known as  
132 “collider”) bias that may distort the association of PRS was suspected.<sup>19,20</sup>

133 The optimal method to improve the predictive accuracy of PRS depends on the population-  
134 and trait-specific genetic architecture.<sup>21–30</sup> Therefore, we compared different PRS methods  
135 and determined whether the best PRS can predict the onset of recurrent stroke in a Japanese  
136 population.

137

138

## 139 **Methods**

140 The workflow of this study is shown in Figure 1. This article follows the TRIPOD  
141 (Transparent reporting of a multivariable prediction model for individual prognosis or  
142 diagnosis) reporting guidelines.

143

### 144 **Study subjects and quality control**

145 BioBank Japan (BBJ) involves physicians diagnosing all ischemic stroke (AIS) cases at the  
146 collaborating hospitals. BBJ was established in 2003 and recruited 267,000 patients from 12  
147 medical institutions (66 hospitals) in two phases.<sup>31–33</sup> The recruited patients had at least one  
148 of the 51 primarily multifactorial (common) diseases, which accounted for 440,000 cases.  
149 We used BBJ 1<sup>st</sup> cohort (BBJ1) data to derive PRSs and available independent BBJ 2<sup>nd</sup>  
150 cohort (BBJ2) data to evaluate the performance of PRSs in predicting AIS and recurrent AIS.  
151 Recurrent AIS information was unavailable for the BBJ1 data. In BBJ2, any AIS cases  
152 (n=1,470), AIS-free controls (n=40,459), recurrent AIS cases (n=174), and non-recurrent AIS  
153 controls (n=1,153) were available. The mean duration from the first episode of AIS onset to  
154 recurrent AIS onset was 4.88 years. Detailed sample characteristics are listed in  
155 Supplementary Methods and Table 1.

156 This study was approved by the ethics committee of the Institute of Medical Science, the  
157 University of Tokyo, Japan. Quality control, pre-phasing, and genotype imputation were  
158 conducted using PLINK(v2.0),<sup>34–37</sup> Eagle (v2.4.1), and Minimac4 (v1.0.2), respectively. The  
159 detailed processes are presented in the Supplementary Methods.

160

### 161 **Constructing PRSs for AIS**

162 Unbiased PRSs were obtained by applying a 10-fold cross-validation to select the model and  
163 optimize the parameters.<sup>26,38</sup> Briefly, BBJ1 samples were randomly split into ten equal-sized



164 subsamples. We retained one subsample for validation and the others for training. We  
165 repeated this process 10 times, with each of the ten subsamples used exactly once for  
166 validation. A GWAS was conducted on the training set in each iteration, adjusted for age,  
167 sex, and the first 10 principal components (PCs) via Firth logistic regression using PLINK  
168 (v.2.0).<sup>34</sup>

169 We obtained the weights of variants for PRS from the GWAS summary statistics of the  
170 training set using five PRS methods—P+T (PLINK (v.1.9)<sup>35</sup> for clumping), LDpred2,<sup>39</sup>  
171 Lassosum2,<sup>40</sup> (LDpred2 and Lassosum2 by bigsnpr package (v.1.7.2) in R (v.3.5.0)), PRS-CS  
172 (v.1.0.0),<sup>41</sup> and PRS-CSx (v.1.0.0).<sup>42</sup> The PRS-CSx integrated BBJ1 with the European  
173 stroke GWAS summary statistics (MEGASTROKE; the largest study available at this study  
174 design)<sup>43</sup> by learning an optimal linear combination. We used combinations of parameters for  
175 P+T (1,224 parameters), LDpred2 (126 parameters), Lassosum2 (200 parameters), PRS-CS  
176 (9 parameters), and PRS-CSx (9 parameters), as described in the Supplementary Methods.

177 Subsequently, the PRSs for the validation sample were calculated using the weights obtained  
178 from the training samples. The accuracy for predicting AIS cases was evaluated from  
179 Nagelkerke's  $R^2$  (simply " $R^2$ " from this point onwards)<sup>29,44</sup> after adjusting for age, sex, and  
180 the first 10 PCs. We calculated the mean  $R^2$  over 10 cross-validation results for each method  
181 with each parameter after a 10-fold cross-validation. We chose the method and parameters  
182 that maximized incremental  $R^2$  ( $PRS_{AIS}$ ) among these PRSs.

183 We further integrated the  $PRS_{AIS}$  with PRSs of vascular risk factors, such as stroke subtypes  
184 and comorbid diseases presence, using the elastic net framework to construct a metaGRS  
185 using the glmnet package (v.4.1.3) in R (v.4.1.0). Nine binary traits and eight quantitative  
186 traits of vascular risk factors reported in a previous study<sup>14</sup> are described in the  
187 Supplementary Methods. Binary traits were determined by conducting GWAS and attempting  
188 to obtain unbiased weights using cross-validations. The effect weights from the derivation

189 sample every 17 traits were calculated using PRS-CS-auto since it did not require an  
190 independent validation sample set for parameter optimization and performed well for various  
191 traits.<sup>21,26,39,41,45</sup> Subsequently, we used a validation sample to calculate the weight of AIS  
192 and the 17-trait PRSs to predict AIS using elastic-net logistic regression. We conducted a 10-  
193 fold cross-validation and used the mean weight for testing.

194 We used PLINK (v2.0)<sup>34</sup> to calculate the individual PRS by aggregating the effect estimates  
195 multiplied by each imputed dosage into a single score per person.

196

### 197 **Risk factors**

198 The following seven risk factors that were previously utilized as covariates<sup>12</sup> were used as  
199 covariates for testing: hypertension (systolic blood pressure>140 mmHg, diastolic blood  
200 pressure>90 mmHg, or hypertension history), hyperlipidemia, diabetes (all types), smoking  
201 (current smoker), vascular disease (myocardial infarction, peripheral artery disease, stable  
202 angina pectoris, and unstable angina pectoris), congestive heart failure, and atrial fibrillation  
203 (including atrial flutter). A sample was considered to have a risk factor status if it had that  
204 status at enrollment or from historical records (Tables 1 and S1).

205

### 206 **Assessment of the association of PRS with AIS and AIS recurrence**

207 We used a single selected method with optimized parameters and calculated the metaGRS in  
208 independent testing sample sets. We used a logistic regression model to assess the association  
209 of the PRS using the two case-control settings for AIS (any-AIS versus AIS-free controls)  
210 and AIS recurrence (recurrent AIS versus non-recurrent AIS). We also applied two other  
211 combinations of case-controls: recurrent AIS versus AIS-free controls and non-recurrent AIS  
212 versus AIS-free controls (Figure 1). Furthermore, we examined additional PRS contributions  
213 of the seven risk factors to predictive accuracy and discriminative performance using the

214 values of  $R^2$  and area under the curve (AUC), according to our previous studies.<sup>14,46</sup>  
215 Additionally, we evaluated the performance of the following PRSs derived from other  
216 milestone studies for stroke prediction: 32 genome-wide significant variants (for any stroke,  
217 ischemic stroke, or ischemic stroke subtypes) from the MEGASTROKE cross-ancestry study  
218 of 524,354 individuals (PRS<sub>32</sub>),<sup>43</sup> 89 genome-wide significant variants of 1,614,080 multi-  
219 population individuals (PRS<sub>89</sub>), and 6,010,730 variants of the East Asian PRS developed  
220 from 9,809 individuals (iPGS<sub>EAS</sub>),<sup>18</sup> both from the GIGASTROKE study. The PRS  
221 calculation process is described in the Supplementary Methods.

222

### 223 **Considering potential index event bias**

224 An index event bias may be induced when the samples are only selected from cases.<sup>47</sup> We  
225 evaluated the extent to which the index event bias affected our results since we used case-  
226 only samples in this study. The association of PRSs with recurrent AIS was evaluated after  
227 adjusting for seven risk factors, in addition to age, sex, and the first 10 PCs. Adjusting for  
228 such confounding bias will not be enough to eliminate bias for a recurrence association  
229 study.<sup>48</sup> Therefore, we sought to mitigate a potential index event bias by applying three  
230 distinct methodologies.<sup>48,49</sup> First, we utilized linear and logistic regression models to assess  
231 the relationships between metaGRS and covariates within the any-AIS case (n=1,327) and  
232 AIS-free control groups (n=40,459). Initially, we did not adjust for age, sex, the seven risk  
233 factors, or the first 10 PCs. Subsequently, we observed the distributions of covariate values  
234 across the metaGRS quintiles. We performed statistical tests to detect heterogeneity in the  
235 estimates between the prevalent case and control groups, following the methodology of a  
236 prior study.<sup>19,50</sup> Second, we refined our analysis by adjusting for associations between  
237 metaGRS and AIS recurrence while considering the differential effects of covariates,  
238 according to a previous method.<sup>19</sup> Finally, we applied the inverse probability weighted (IPW)

239 approach<sup>47</sup> to comprehensively account for index event bias. Collectively, these analytical  
240 approaches were adopted to enhance the validity of our findings.

241

#### 242 **Association of metaGRS and AIS recurrence in patients with/without hypertension**

243 Logistic regression was conducted in subgroups with and without hypertension and metaGRS  
244 tertiles among recurrent AIS cases (with hypertension n=107, without hypertension n=67)  
245 and non-recurrent AIS controls (with hypertension n=731, without hypertension n=422) to  
246 assess the relationship between the PRS and the risk of AIS recurrence. The low metaGRS  
247 tertile was set as the reference group and adjusted for age, sex, and the first 10 PCs.

248

#### 249 **Statistical analysis**

250 The mean with standard deviation (SD) or proportion of factors was reported for the baseline  
251 characteristics of testing samples. The incremental value ( $R^2$  or AUC) was estimated from  
252 the differences between patients with and without PRSs of the fitted values of age, sex, first  
253 10 PCs, and seven risk factors<sup>48,57,58</sup> and calculated as the 95% confidence interval. The  
254 pROC package (v.1.18.0) in R was used to determine the discriminative ability of the AUC.  
255 The IPW package (v.1.2) in R was used for the IPW approach. R (v. 3.5.0) was used to  
256 perform logistic regression to calculate  $R^2$ , Pearson's correlation coefficient, and linear  
257 regression. All statistical tests were two-sided. The significance level was set at  $p = 0.05$ .

258

259

## 260 Results

261

### 262 Derivation of effect weight

263 The imputed genotype data of 17,621 AIS cases and 162,317 controls without an AIS  
264 diagnosis were used for 9,622,629 autosomal variants after implementing quality control of  
265 the BBJ1 dataset (Tables S2-S4).

266 We conducted a 10-fold cross-validation to adjust the parameters and select the best PRS  
267 associated with AIS. We performed GWAS 10 times on 90% of the randomly selected BBJ1  
268 dataset (training data). We successfully detected previously reported<sup>43,51</sup> signals in each  
269 dataset ( $p < 5 \times 10^{-8}$ ), including *SH3PXD2A*, *CCDC63* (eight times), *CUX2*, and *LINC02356*  
270 (every time) (Figure S1, Table S5).

271 We confirmed some expected characteristics of each PRS method (such as low accuracy)  
272 using only genome-wide significant variants (Tables S6–10 and Supplementary Notes). The  
273 mean incremental  $R^2$  values of each scoring method with the best-performed parameters  
274 were 0.0038 (95% CI: 0.0030–0.0046), 0.00443 (95% CI: 0.0035–0.0054), 0.0039 (95% CI:  
275 0.0030–0.0048), 0.00441 (95% CI: 0.0036–0.0053), and 0.0037 (95% CI: 0.0031–0.0042)  
276 for P+T, LDpred2, Lassosum2, PRS-CS, and PRS-CSx, respectively (Table 2). We chose  
277 LDpred2 with the parameter set of  $\rho$ -value = 0.0056, a heritability-value =  $1.0 \times h^2_{LDSC}$ ,  
278 where  $h^2_{LDSC}$  is the heritability estimate from the constrained LD score regression<sup>52</sup>, and a  
279 no-sparse model for subsequent analyses, since it showed the best mean incremental  $R^2$  value  
280 among the five methods.

281 We observed an average number of nonzero weights for 8.4 traits after computing the  
282 metaGRS via elastic net regularization 10 times (10-fold). The metaGRS weight of AIS was  
283 highest (mean=0.123, SD=0.026), followed by diastolic blood pressure (mean=0.039,  
284 SD=0.039), atrial fibrillation (mean=0.023, SD=0.024), and myocardial infarction

285 (mean=0.018, SD=0.025) (Figure S2 and Table S11). Only the triglyceride weights were zero  
286 at all 10 measurements among the 18 traits included in the metaGRS calculation. The number  
287 of variants used for metaGRS was 1,014,026; a total of 1,011,847 variants (99.8%) remained  
288 after matching with the BBJ2 dataset.

289

### 290 **Association of metaGRS with AIS cases and recurrent AIS**

291 We used the imputed genotype data of 1,470 AIS cases and 40,459 controls without a  
292 diagnosis of AIS for 59,387,070 variants from the BBJ2 dataset to test the association of  
293 metaGRS with AIS and AIS recurrence. The AIS case-only sample of the BBJ2 was used to  
294 analyze AIS recurrence. Table 1 presents the characteristics of the test samples.

295 MetaGRS was associated with AIS diagnosis after adjusting for age, sex, first 10 PCs, and  
296 seven risk factors (adjusted OR, 1.21 [95% CI: 1.15–1.27,  $p=2.89\times 10^{-12}$ ]), as previously  
297 reported.<sup>14,18</sup> MetaGRS was also associated with AIS recurrence compared with recurrence-  
298 free AIS (adjusted OR 1.18 [95% CI: 1.00–1.39,  $p=0.044$ ]; Table 3 and Figure S3). MetaGRS  
299 showed stronger association when comparing recurrent AIS with AIS-free controls (adjusted  
300 OR 1.37 [95% CI: 1.18–1.59,  $p=5.35\times 10^{-5}$ ]; Table S12).

301 The contribution of the metaGRS and traditional risk factors showed an AIS prediction  
302 accuracy with an  $R^2$  value of 0.06 and an AUC of 0.689 after constructing the baseline model  
303 using age, sex, the first 10 PCs, and seven risk factors. The incremental AUCs were 0.0087  
304 and 0.0123 for AIS and AIS recurrence, respectively when metaGRS was added to the  
305 baseline model (Table 3). In our dataset, clinical risk factors (including hypertension) were  
306 related to AIS diagnosis but were insignificantly associated with AIS recurrence (Table S1).

307 We assessed the prediction performance of previously developed PRSs for AIS and AIS  
308 recurrence in our dataset. After matching with the BBJ2 dataset (Supplementary Methods),  
309 27, 84, and 5,756,652 variants remained in PRS<sub>32</sub>, PRS<sub>89</sub>, and iPGS, respectively. We

310 confirmed their association with AIS diagnosis; adjusted ORs were 1.11 [95% CI: 1.06–1.17,  
311  $p=4.23\times 10^{-5}$ ], 1.08 [95% CI: 1.03–1.14,  $p=2.96\times 10^{-3}$ ], and 1.26 [95% CI: 1.20–1.33,  
312  $p=1.24\times 10^{-17}$ ] for PRS<sub>32</sub>, PRS<sub>89</sub>, and iPGS, respectively (Table 3, Figure S3); however, a  
313 significant association was not observed between PRSs and AIS recurrence (p-values of 0.41,  
314 0.054, and 0.37, respectively; Table 3 and Figure S3). Our Japanese optimized metaGRS was  
315 the only PRS significantly associated with AIS recurrence in this study.

316

### 317 **Analyzing for potential index event bias**

318 We observed the values of covariates at the AIS-free control group and any-AIS case group  
319 in each quintile. We did not find any significant heterogeneous relationships between the  
320 covariates and the metaGRS in terms of regression estimates in the prevalent case and  
321 control samples ( $p>0.05$ , Table S13).

322 We used three different variable models—i) age and sex; ii) age, sex, and seven risk factors;  
323 and iii) age, sex, the first 10 PCs, and seven risk factors—to determine the association  
324 between metaGRS and recurrent AIS; none of these confounders significantly influenced our  
325 results (Figure S4).

326 We compared the association results of IPW adjusted (accounting for index event bias) with  
327 those of non-adjusted IPW (accounting for confounding bias). The results remained almost  
328 unchanged, but the 95% confidence intervals overlapped (Figure S5). A comparison of the  
329 three distinct models did not indicate an effect of index event bias.

330

### 331 **Association of metaGRS and AIS recurrence in patients with/without hypertension**

332 We divided the test sample into subgroups according to the presence or absence of a history  
333 of hypertension and evaluated the risk effect of the metaGRS tertile. The high metaGRS  
334 group without a history of hypertension showed a higher risk effect for AIS recurrence

335 compared to the low metaGRS group (OR of the high metaGRS group compared to that of  
336 the low metaGRS group was 2.24 [95% CI: 1.07–4.66,  $p=0.032$ ], Figure 2 and Table S14).  
337 However, no significant association was observed between the metaGRS and AIS recurrence  
338 in the group with a history of hypertension (the OR of the high metaGRS group compared to  
339 that of the low metaGRS group was 1.21 [95% CI: 0.69–2.13,  $p=0.50$ ] (Figure 2 and Table  
340 S14).

341

342



## 343 Discussion

344 We successfully examined the association between recurrent AIS and our best model PRS  
345 (metaGRS using LDpred2); the adjusted OR was 1.18 for each unit of SD increase in PRS.  
346 Our metaGRS showed stronger (adjusted OR per SD=1.37) association when comparing  
347 recurrent AIS with AIS-free controls. Furthermore, a high PRS was associated with AIS  
348 recurrence particularly in groups without a history of hypertension (OR of the top vs. bottom  
349 metaGRS tertile=2.24). These results are consistent with the result of a previous study  
350 wherein the stroke prediction accuracy of the PRS was high in the group with low  
351 CHA2DS2-VASc scores.<sup>12</sup> These results indicate the utility of the PRS in developing more  
352 precise strategies to prevent AIS recurrence in individuals with a high PRS who do not have  
353 high profiles based on clinical risk factors.

354 We attempted to mitigate potential index event bias since our purpose was to specifically  
355 determine the efficacy of PRS among AIS patients. It is difficult to predict and provide an  
356 accurate assessment of recurrent AIS based on genetic predisposition owing to the possible  
357 effect of index event bias leading to a distorted association in studies on recurrent  
358 stroke.<sup>19,20,53</sup> This study found no evidence of heterogeneous associations between covariates  
359 and the metaGRS; we did not find any evidence of a solid collider bias of known variables.  
360 By applying IPW, we confirmed that our results support the association between metaGRS  
361 and recurrent AIS.

362 There are three putative reasons our metaGRS could predict AIS recurrence. First, the  
363 metaGRS algorithm combines the genetic profiles of related traits and slightly improves the  
364 performance, reaching the level of significance. Second, the performances of PRS-CS  
365 (incremental  $R^2=0.00441$ ) and LDpred2 (incremental  $R^2=0.00443$ ) in our validation analysis  
366 were better than those of other traditional PRS methods, such as P+T (incremental  
367  $R^2=0.0038$ ). This demonstrated the importance of using shrinkage estimation methods that

368 consider LD to predict AIS and AIS recurrence. Third, we restricted to use only single  
369 matched ancestry throughout.

370 Nevertheless, our study had several limitations. First, the sample size for recurrent AIS needs  
371 to be increased (n=174 at testing), even in the largest hospital-based biobank in Japan.  
372 Compared to our metaGRS, iPGS constructed in GIGASTROKE showed a stronger  
373 association for AIS and weaker association for AIS recurrence. Although potential  
374 discrepancies exist, both PRSs (metaGRS and iPGS) exhibit the same direction of effects and  
375 have overlapping confidence intervals (Table 3, Figure S3). Second, despite using as many  
376 covariates (age, sex, the first 10 PCs, and seven risk factors (hypertension, hyperlipidemia,  
377 diabetes mellitus, smoking, vascular disease, congestive heart failure, and atrial fibrillation))  
378 as possible based on a previous study,<sup>12</sup> other confounders might have affected our results.  
379 Finally, there may have been an index event bias that was not fully detected by each method  
380 that we implemented; however this risk was minimized using multiple approaches. Further  
381 studies using different sample sets (including other ancestry groups) are warranted to confirm  
382 the prediction of recurrent stroke using the PRS.

383

384 In conclusion, our study indicated that PRS can be applied to predict AIS recurrence in  
385 addition to traditional clinical risk factors. This shows the potential utility of PRS in  
386 population-based screening and in the clinical setting. Overall, our results indicate that  
387 stratifying high-risk groups for recurrent stroke among those who have experienced a stroke  
388 could be medically beneficial and help in developing personalized strategies for recurrence  
389 prevention. Our results suggest that it might be particularly useful in patients with AIS  
390 without hypertension, although this requires confirmation in independent datasets.

391

## 392 **Acknowledgments**

393 We want to acknowledge all the participants and investigators of BioBank Japan.  
394 Supercomputing resources were provided by the Human Genome Center, Institute of Medical  
395 Science, and the University of Tokyo (<http://sc.hgc.jp/shirokane.html>). The ToMMo  
396 summary statistics were derived from jMorp ([https://jmorp.megabank.tohoku.ac.jp/gwas-](https://jmorp.megabank.tohoku.ac.jp/gwas-studies/TGA000007)  
397 [studies/TGA000007](https://jmorp.megabank.tohoku.ac.jp/gwas-studies/TGA000007)). The MEGASTROKE project received funding from sources specified  
398 at <https://www.megastroke.org/acknowledgements.html>

399

## 400 **Data availability**

401 The weights of metaGRS derived in this study will be publicly available after acceptance.  
402 Genotype datasets were deposited in the National Bioscience Database Center Human  
403 Database (BBJ1, Research ID: hum0014; BBJ2, Research ID: hum0311).

404

## 405 **Source of Funding**

406 This research was supported by the Ministry of Education, Culture, Sports, Sciences and  
407 Technology (MEXT) of the Japanese government and the Japan Agency for Medical  
408 Research and Development (AMED) under grant nos. JP18km0605001/ JP23tm0624002 (the  
409 BioBank Japan project), JP223fa627011 (Y.K.), and JP23tm0524003 (Y.K.).

410

## 411 **Disclosures**

412 Y.K. holds stock of StaGen Co, Ltd.

413

## 414 **Supplementary Material**

415 Supplementary Methods

416 Supplementary Notes

417 Tables S1–S15

418 Figures S1–S5

419

## 420 References

421

- 422 1. Ministry of Health, L. and W. Vital Statistics of Japan,  
423 <https://www.mhlw.go.jp/toukei/saikin/hw/jinkou/kakutei20/index.html>. (2020).
- 424 2. O'Donnell, M. J. *et al.* Global and regional effects of potentially modifiable risk  
425 factors associated with acute stroke in 32 countries (INTERSTROKE): a case-control  
426 study. *The Lancet* **388**, 761–775 (2016).
- 427 3. Hata, J. *et al.* Ten year recurrence after first ever stroke in a Japanese community: The  
428 Hisayama study. *J Neurol Neurosurg Psychiatry* **76**, 368–372 (2005).
- 429 4. Takashima, N. *et al.* Long-term survival after stroke in 1.4 million Japanese  
430 population: Shiga stroke and heart attack registry. *J Stroke* **22**, 336–344 (2020).
- 431 5. MacArthur, J. *et al.* The new NHGRI-EBI Catalog of published genome-wide  
432 association studies (GWAS Catalog). *Nucleic Acids Res* **45**, D896–D901 (2017).
- 433 6. Torkamani, A., Wineinger, N. E. & Topol, E. J. The personal and clinical utility of  
434 polygenic risk scores. *Nat Rev Genet* **19**, 581–590 (2018).
- 435 7. Khera, A. v. *et al.* Whole-Genome Sequencing to Characterize Monogenic and  
436 Polygenic Contributions in Patients Hospitalized With Early-Onset Myocardial  
437 Infarction. *Circulation* **139**, 1593–1602 (2019).
- 438 8. Konuma, T. & Okada, Y. Statistical genetics and polygenic risk score for precision  
439 medicine. *Inflamm Regen* **41**, (2021).
- 440 9. Levin, M. G. & Rader, D. J. Polygenic Risk Scores and Coronary Artery Disease.  
441 *Circulation* 637–640 (2020) doi:10.1161/CIRCULATIONAHA.119.044770.
- 442 10. Plagnol, V. Polygenic score development in the era of large-scale biobanks. *Cell*  
443 *Genomics* **2**, 100088 (2022).
- 444 11. Khera, A. v. *et al.* Genome-wide polygenic scores for common diseases identify  
445 individuals with risk equivalent to monogenic mutations. *Nature Genetics* vol. 50  
446 1219–1224 Preprint at <https://doi.org/10.1038/s41588-018-0183-z> (2018).
- 447 12. Marston NA *et al.* Clinical Application of A Novel Genetic Risk Score Predicts  
448 Ischemic Stroke in Patients With Cardiometabolic Disease. *Circulation*. 2021 Feb  
449 2;143(5):470-478. doi: 10.1161/CIRCULATIONAHA.120.051927. Epub 2020 Nov 13.  
450 PMID: 33185476; PMCID: PMC7856243. (2020).
- 451 13. Rutten-Jacobs, L. C. A. *et al.* Genetic risk, incident stroke, and the benefits of adhering  
452 to a healthy lifestyle: Cohort study of 306 473 UK Biobank participants. *BMJ (Online)*  
453 **363**, 1–8 (2018).
- 454 14. Abraham, G. *et al.* Genomic risk score offers predictive performance comparable to  
455 clinical risk factors for ischaemic stroke. *Nat Commun* **10**, 1–10 (2019).
- 456 15. Thomas, E. A. *et al.* Polygenic Risk, Midlife Life's Simple 7, and Lifetime Risk of  
457 Stroke. *J Am Heart Assoc* **11**, (2022).
- 458 16. Hachiya, T. *et al.* Genetic Predisposition to Ischemic Stroke: A Polygenic Risk Score.  
459 *Stroke* **48**, 253–258 (2017).
- 460 17. Hachiya, T. *et al.* Genome-wide polygenic score and the risk of ischemic stroke in a  
461 prospective cohort: The Hisayama study. *Stroke* 759–765 (2020)

- 462 doi:10.1161/STROKEAHA.119.027520.
- 463 18. Mishra, A. *et al.* Stroke genetics informs drug discovery and risk prediction across  
464 ancestries. *Nature* (2022) doi:10.1038/s41586-022-05165-3.
- 465 19. Howe, L. J. *et al.* Polygenic risk scores for coronary artery disease and subsequent  
466 event risk amongst established cases. *Hum Mol Genet* **29**, 1388–1395 (2020).
- 467 20. Dahabreh, I. J. & Kent, D. M. *Index Event Bias as an Explanation for the Paradoxes*  
468 *of Recurrence Risk Research*. <https://jamanetwork.com/>.
- 469 21. Ni, G. *et al.* A Comparison of Ten Polygenic Score Methods for Psychiatric Disorders  
470 Applied Across Multiple Cohorts. *Biol Psychiatry* **90**, 611–620 (2021).
- 471 22. Hahn, G. *et al.* A Smoothed Version of the Lasso Penalty for Fitting Integrated  
472 Risk Models Using Summary Statistics or Individual-Level Data. *Genes (Basel)* **13**,  
473 (2022).
- 474 23. Osterman, M. D., Kinzy, T. G. & Bailey, J. N. C. Polygenic Risk Scores. *Curr Protoc*  
475 **1**, (2021).
- 476 24. Zhao, Z., Song, J., Wang, T. & Lu, Q. Polygenic risk scores: effect estimation and  
477 model optimization. *Quantitative Biology* **0**, 0 (2021).
- 478 25. Ma, Y. & Zhou, X. Genetic prediction of complex traits with polygenic scores: a  
479 statistical review. *Trends in Genetics* **37**, 995–1011 (2021).
- 480 26. Pain, O. *et al.* Evaluation of polygenic prediction methodology within a reference-  
481 standardized framework. *PLoS Genet* **17**, 1–22 (2021).
- 482 27. Zhang, Q., Privé, F., Vilhjálmsón, B. & Speed, D. Improved genetic prediction of  
483 complex traits from individual-level data or summary statistics. *Nat Commun* **12**, 1–9  
484 (2021).
- 485 28. Yang, S. & Zhou, X. PGS-server: accuracy, robustness and transferability of polygenic  
486 score methods for biobank scale studies. *Brief Bioinform* **23**, 1–19 (2022).
- 487 29. Wang, Y., Tsuo, K., Kanai, M., Neale, B. M. & Martin, A. R. Challenges and  
488 opportunities for developing more generalizable polygenic risk scores. 293–320  
489 (2022).
- 490 30. Kulm, S., Marderstein, A., Mezey, J. & Elemento, O. A systematic framework for  
491 assessing the clinical impact of polygenic risk scores. *medRxiv preprint* doi:  
492 <https://doi.org/10.1101/2020.04.06.20055574> (2021)  
493 doi:10.1101/2020.04.06.20055574.
- 494 31. Nagai, A. *et al.* Overview of the BioBank Japan Project: Study design and profile. *J*  
495 *Epidemiol* **27**, S2–S8 (2017).
- 496 32. Hirata, M. *et al.* Cross-sectional analysis of BioBank Japan clinical data: A large  
497 cohort of 200,000 patients with 47 common diseases. *J Epidemiol* **27**, S9–S21 (2017).
- 498 33. Hirata, M. *et al.* Overview of BioBank Japan follow-up data in 32 diseases. *J*  
499 *Epidemiol* **27**, S22–S28 (2017).
- 500 34. Chang, C. C. *et al.* Second-generation PLINK: Rising to the challenge of larger and  
501 richer datasets. *Gigascience* **4**, 1–16 (2015).
- 502 35. Purcell, S. *et al.* PLINK: A tool set for whole-genome association and population-  
503 based linkage analyses. *Am J Hum Genet* **81**, 559–575 (2007).
- 504 36. Marees, A. T. *et al.* A tutorial on conducting genome-wide association studies: Quality  
505 control and statistical analysis. *Int J Methods Psychiatr Res* **27**, 1–10 (2018).
- 506 37. Choi, S. W., Mak, T. S. H. & O'Reilly, P. F. Tutorial: a guide to performing polygenic  
507 risk score analyses. *Nat Protoc* **15**, 2759–2772 (2020).
- 508 38. Koyama, S. *et al.* Population-specific and trans-ancestry genome-wide analyses  
509 identify distinct and shared genetic risk loci for coronary artery disease. *Nat Genet* **52**,  
510 1169–1177 (2020).
- 511 39. Privé, F., Arbel, J. & Vilhjálmsón, B. J. LDpred2: Better, faster, stronger.

- 512 *Bioinformatics* **36**, 5424–5431 (2020).
- 513 40. Privé, F., Arbel, J., Aschard, H. & Vilhjálmsson, B. J. Identifying and correcting for  
514 misspecifications in GWAS summary statistics and polygenic scores. *Human Genetics*  
515 *and Genomics Advances* 100136 (2022) doi:10.1016/j.xhgg.2022.100136.
- 516 41. Ge, T., Chen, C. Y., Ni, Y., Feng, Y. C. A. & Smoller, J. W. Polygenic prediction via  
517 Bayesian regression and continuous shrinkage priors. *Nat Commun* **10**, 1–10 (2019).
- 518 42. Ruan, Y. *et al.* Improving polygenic prediction in ancestrally diverse populations. *Nat*  
519 *Genet* (2022) doi:10.1038/s41588-022-01054-7.
- 520 43. Malik, R. *et al.* Multiancestry genome-wide association study of 520,000 subjects  
521 identifies 32 loci associated with stroke and stroke subtypes. *Nat Genet* **50**, 524–537  
522 (2018).
- 523 44. Nagelkerke N. J. D. A Note on a General Definition of the Coefficient of  
524 Determination. *Biometrika* **78**, 691–692 (1991).
- 525 45. Wang, Y. *et al.* Global Biobank analyses provide lessons for developing polygenic risk  
526 scores across diverse cohorts. *Cell Genomics* **3**, (2023).
- 527 46. Hindy, G. *et al.* Genome-wide polygenic score, clinical risk factors, and long-term  
528 trajectories of coronary artery disease. *Arterioscler Thromb Vasc Biol* 2738–2746  
529 (2020) doi:10.1161/ATVBAHA.120.314856.
- 530 47. Mitchell, R. E. *et al.* Strategies to investigate and mitigate collider bias in genetic and  
531 Mendelian randomisation studies of disease progression. *PLoS Genetics* vol. 19  
532 Preprint at <https://doi.org/10.1371/journal.pgen.1010596> (2023).
- 533 48. Sep, S. J., Van Kuijk, S. M. & Smits, L. J. Index event bias: Problems with eliminating  
534 the paradox. *Journal of Stroke and Cerebrovascular Diseases* vol. 23 2464 Preprint at  
535 <https://doi.org/10.1016/j.jstrokecerebrovasdis.2014.06.025> (2014).
- 536 49. Levine, D. A. *et al.* Smoking and mortality in stroke survivors: Can we eliminate the  
537 paradox? *Journal of Stroke and Cerebrovascular Diseases* **23**, 1282–1290 (2014).
- 538 50. Altman, D. G. & Bland, J. M. Interaction revisited: The difference between two  
539 estimates. *BMJ* **326**, 219 (2003).
- 540 51. Ishigaki, K. *et al.* Large-scale genome-wide association study in a Japanese population  
541 identifies novel susceptibility loci across different diseases. *Nat Genet* **52**, 669–679  
542 (2020).
- 543 52. Bulik-Sullivan, B. *et al.* LD score regression distinguishes confounding from  
544 polygenicity in genome-wide association studies. *Nat Genet* **47**, 291–295 (2015).
- 545 53. Cho, S. M. J. *et al.* Genetic, sociodemographic, lifestyle, and clinical risk factors of  
546 recurrent coronary artery disease events: a population-based cohort study. *Eur Heart J*  
547 (2023) doi:10.1093/eurheartj/ehad380.
- 548 54. Weale, E. M. Quality control for genome-wide association studies. *Methods Mol Biol*  
549 (2010) doi:10.1007/978-1-60327-367-1\_19.
- 550 55. Akiyama, M. *et al.* Characterizing rare and low-frequency height-associated variants  
551 in the Japanese population. *Nat Commun* **10**, (2019).
- 552 56. Privé, F., Vilhjálmsson, B. J., Aschard, H. & Blum, M. G. B. Making the Most of  
553 Clumping and Thresholding for Polygenic Scores. *Am J Hum Genet* **105**, 1213–1221  
554 (2019).
- 555 57. Chagnon, M., O’Loughlin, J., Engert, J. C., Karp, I. & Sylvestre, M. P. Missing single  
556 nucleotide polymorphisms in Genetic Risk Scores: A simulation study. *PLoS One* **13**,  
557 1–14 (2018).
- 558 58. Goldstein, B. A., Yang, L., Salfati, E. & Assimes, T. L. Contemporary Considerations  
559 for Constructing a Genetic Risk Score: An Empirical Approach. *Genet Epidemiol* **39**,  
560 439–445 (2015).
- 561 59. Wang, Y. *et al.* Global Biobank analyses provide lessons for developing polygenic risk



- 562 scores across diverse cohorts. *Cell Genomics* **3**, (2023).
- 563 60. Tadaka, S. *et al.* jMorp updates in 2020: Large enhancement of multi-omics data  
564 resources on the general Japanese population. *Nucleic Acids Res* **49**, D536–D544  
565 (2021).
- 566 61. Restuadi, R. *et al.* Polygenic risk score analysis for amyotrophic lateral sclerosis  
567 leveraging cognitive performance, educational attainment and schizophrenia.  
568 *European Journal of Human Genetics* (2021) doi:10.1038/s41431-021-00885-y.
- 569 62. Turley, P. *et al.* Multi-trait analysis of genome-wide association summary statistics  
570 using MTAG. *Nat Genet* **50**, 229–237 (2018).
- 571 63. Maier, R. M. *et al.* Improving genetic prediction by leveraging genetic correlations  
572 among human diseases and traits. *Nat Commun* **9**, 1–17 (2018).
- 573 64. Ho, W. K. *et al.* European polygenic risk score for prediction of breast cancer shows  
574 similar performance in Asian women. *Nat Commun* **11**, 1–11 (2020).
- 575 65. Amariuta, T. *et al.* Improving the trans-ancestry portability of polygenic risk scores by  
576 prioritizing variants in predicted cell-type-specific regulatory elements. *Nat Genet* **52**,  
577 1346–1354 (2020).
- 578
- 579

580 **Tables**

581

582 **Table 1. Characteristic of the testing sample (BBJ2)**

583

|                     | Any-AIS<br>versus AIS-free controls |      |                 |             | Recurrent AIS<br>versus non-recurrent AIS |      |                 |             |
|---------------------|-------------------------------------|------|-----------------|-------------|-------------------------------------------|------|-----------------|-------------|
|                     | N sample<br>(%, SD)                 | OR   | 95%<br>CI       | p-<br>value | N sample<br>(%, SD)                       | OR   | 95%<br>CI       | p-<br>value |
| Total participants  | 41,929<br>(100%)                    | -    | -               | -           | 1,327<br>(100%)                           | -    | -               | -           |
| AIS / AIS recurrent | 1,470<br>(3.5%)                     | -    | -               | -           | 174<br>(13.1%)                            | -    | -               | -           |
| Age (SD)*           | 70.0<br>(SD=12.6)                   | 1.18 | [1.06–<br>1.31] | 0.002       | 64.1<br>(SD=11.5)                         | 0.83 | [0.59–<br>1.16] | 0.256       |
| Female sex          | 19,407<br>(46.3%)                   | 0.48 | [0.43–<br>0.54] | <0.001      | 383<br>(28.9%)                            | 0.63 | [0.42–<br>0.93] | 0.019       |
| Hypertension        | 17,710<br>(42.2%)                   | 2.27 | [2.04–<br>2.53] | <0.001      | 838<br>(63.1%)                            | 0.92 | [0.66–<br>1.3]  | 0.673       |
| Hyperlipidemia      | 11,604<br>(27.7%)                   | 2.17 | [1.95–<br>2.41] | <0.001      | 603<br>(45.4%)                            | 0.92 | [0.66–<br>1.29] | 0.625       |
| Diabetes            | 3,622<br>(8.6%)                     | 1.16 | [0.97–<br>1.39] | 0.089       | 125<br>(9.4%)                             | 0.97 | [0.52–<br>1.7]  | 1.000       |
| Smoking**           | 21,570<br>(51.9%)                   | 1.43 | [1.28–<br>1.59] | <0.001      | 795<br>(60.5%)                            | 1.28 | [0.90–<br>1.82] | 0.179       |
| Vascular disease    | 3,136<br>(7.5%)                     | 1.31 | [1.08–<br>1.56] | 0.005       | 122<br>(9.2%)                             | 1.08 | [0.59–<br>1.87] | 0.778       |
| Heart failure       | 1,329<br>(3.2%)                     | 1.27 | [0.95–<br>1.66] | 0.095       | 48<br>(3.6%)                              | 1.79 | [0.78–<br>3.75] | 0.124       |
| Atrial fibrillation | 1,004<br>(2.4%)                     | 2.22 | [1.71–<br>2.84] | <0.001      | 65<br>(4.9%)                              | 1.07 | [0.46–<br>2.23] | 0.850       |

584

585 All risk factor characteristics were derived from history and not at the time of registration.

586 Odds ratio (OR), 95% CI (95% confidence intervals, and p-values were calculated using

587 logistic regression for onset and AIS recurrence (unadjusted for other factors). \*Age at AIS



588 case-control was that at recruitment, while age at recurrent AIS case-control was that at first  
589 incidence. The numbers indicate the median threshold age. \*\* The total number of missing  
590 values of smoking was 389 for all case-control and 12 for recurrent AIS case-control  
591 samples. Abbreviations: BBJ2, BioBank 2<sup>nd</sup> cohort; AIS, all ischemic stroke; SD = standard  
592 deviation  
593

594 **Table 2. Polygenic risk score performance at validation**

595

| Method    | Best parameters                                                                                              | Mean number of variants | Best mean incremental Nagelkerke R <sup>2</sup> | Standard deviation | 95% confidence interval |
|-----------|--------------------------------------------------------------------------------------------------------------|-------------------------|-------------------------------------------------|--------------------|-------------------------|
| P+T       | Clumping R <sup>2</sup> =0.95,<br>Clumping kb=526,<br>Imputation R <sup>2</sup> =0.8,<br>p-value threshold=1 | 3,144,737               | 0.0038                                          | 0.0012             | 0.0030–<br>0.0046       |
| LDpred2   | ρ value=0.0056,<br>heritability value x<br>1.0,<br>no sparse                                                 | 898,456                 | 0.00443                                         | 0.0013             | 0.0035–<br>0.0054       |
| Lassosum2 | S=0.9,<br>lambda=0.00388                                                                                     | 282,520                 | 0.0039                                          | 0.0013             | 0.0030–<br>0.0048       |
| PRS-CS    | Phi=1.00E-04                                                                                                 | 985,439                 | 0.00441                                         | 0.0012             | 0.0036–<br>0.0053       |
| PRS-CSx   | Phi=1.00E-05                                                                                                 | 1,016,745               | 0.0037                                          | 0.0008             | 0.0031–<br>0.0042       |

596

597

598 **Table 3. Polygenic risk score performance at testing**

599

| PRS Method            | Association tests | OR per SD [95% CI] | p-value  | Incremental AUC | Incremental Nagelkerke R <sup>2</sup> |
|-----------------------|-------------------|--------------------|----------|-----------------|---------------------------------------|
| MetaGRS               | AIS               | 1.21[1.15–1.27]    | 2.89E-12 | 0.0087          | 0.0044                                |
|                       | Recurrence        | 1.18[1.00–1.39]    | 0.044    | 0.0123          | 0.0057                                |
| MEGASTROKE<br>27 SNVs | AIS               | 1.11[1.06–1.17]    | 4.23E-05 | 0.0033          | 0.0015                                |
|                       | Recurrence        | 1.07[0.91–1.25]    | 0.41     | 0.0032          | 0.0009                                |
| GIGASTROKE<br>84 SNVs | AIS               | 1.08[1.03–1.14]    | 2.96E-03 | 0.0022          | 0.0008                                |
|                       | Recurrence        | 1.17[1.00–1.38]    | 0.054    | 0.0125          | 0.0052                                |
| GIGASTROKE<br>iPGS    | AIS               | 1.26[1.20–1.33]    | 1.24E-17 | 0.0130          | 0.0066                                |
|                       | Recurrence        | 1.08[0.91–1.27]    | 0.37     | 0.0044          | 0.0011                                |

600

601 Polygenic risk score performance was evaluated using an independent testing set for AIS and  
602 recurrent AIS. We showed two main association tests; AIS (any-AIS cases vs. AIS-free  
603 controls) and AIS recurrence (recurrent AIS vs. non-recurrent AIS). Incremental AUC and R<sup>2</sup>  
604 are the differences in the values when fitting with/without PRS, along with age, sex, the first  
605 10 PCs, and seven risk factors. Abbreviations: AIS, all ischemic strokes; OR, odds ratio;  
606 AUC, area under the curve; PC, principal components; PRS, polygenic risk score; SD =  
607 standard deviation

608

609 **Figure Legends**

610 **Figure 1. Workflow**

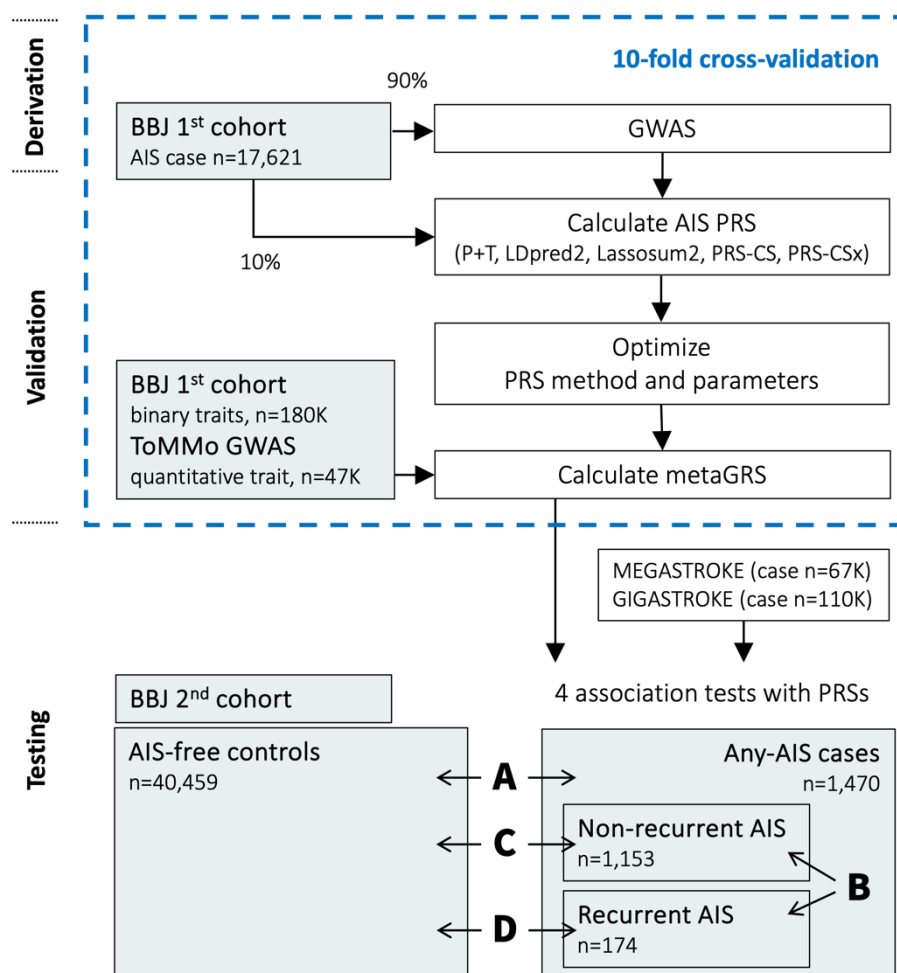

611

612 MEGASTROKE AIS summary statistics of European (EUR) studies were only used for  
 613 PRS-CSx. 1000 Genomes Project super population samples (EAS or EUR) were used for the  
 614 LD reference panel. Abbreviations: GWAS = genome-wide association study, PRS =  
 615 polygenic risk score, P+T = pruning and thresholding, OR = odds ratio, AIS = all ischemic  
 616 stroke, ToMMo = Tohoku Medical Megabank; LD, linkage disequilibrium.

617 We used a logistic regression model to assess the association of the PRS using the two case-  
 618 control settings for AIS (**A**: any-AIS vs. AIS-free controls) and AIS recurrence (**B**: recurrent  
 619 AIS vs. non-recurrent AIS). We also applied two other combinations of case-controls (**C**:  
 620 recurrent versus AIS-free controls and **D**: non-recurrent versus AIS-free controls).

621

622 **Figure 2. Odds ratio of metaGRS tertiles with/without a history of hypertension**

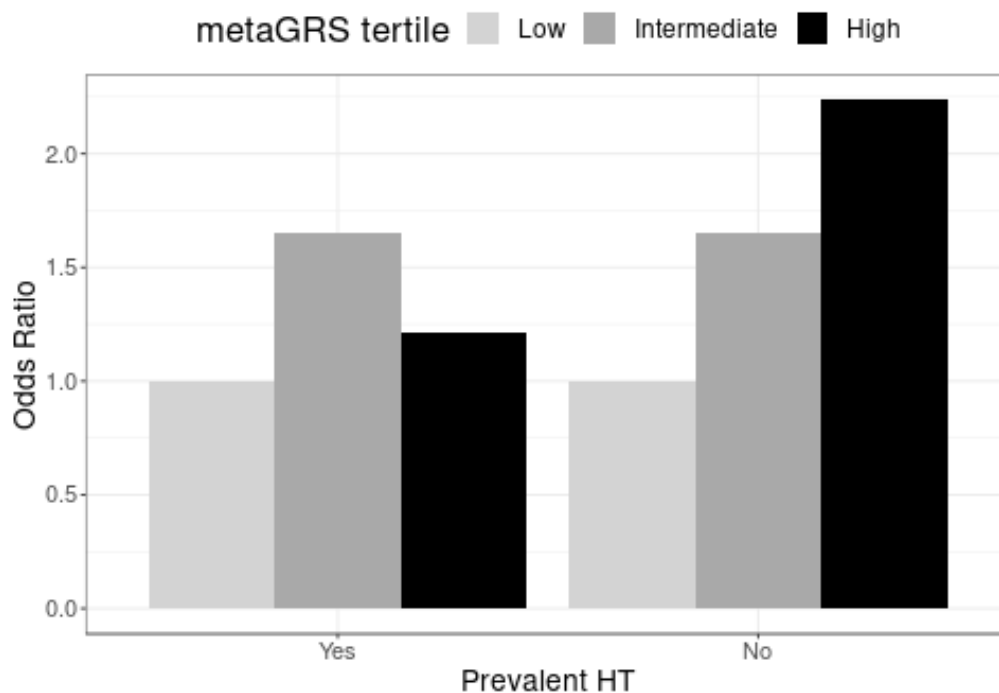

623

624

625 Association of AIS recurrence and meta-GRS tertiles with or without a history of  
626 hypertension (HT) in the testing sample, with reference to the low metaGRS tertiles.

627

628

629

630

631

632

633

634

635

## **SUPPLEMENTARY MATERIALS**

636

637

638

**Recurrent stroke prediction by applying a stroke polygenic risk score**

639

**in the Japanese population**

640

641

642

## 643 **Supplementary Methods**

644

### 645 **Samples**

646 BioBank Japan (BBJ) collected DNA, serum, and medical records (clinical information) with  
647 consent from patients. The BBJ 1<sup>st</sup> cohort (BBJ1) dataset contained all ischemic stroke (AIS,  
648 n=17,621) cases, including large artery stroke (LAS, n=981), small vessel stroke (SVS,  
649 n=3,108), and cardioembolic stroke (CES, n=608) cases. The patients without AIS were  
650 included as controls (n=162,317).

651 Testing involved the use of data from part of the BBJ 2<sup>nd</sup> cohort (BBJ2) dataset, which  
652 contains information about AIS cases (n=1,470), including LAS (n=268), SVS (n=508), CES  
653 (n=122), and transient ischemic attack (TIA, n=105). All patients without AIS were included  
654 as controls (n=40,459). Among these cases, recurrent ischemic stroke (n=187) was used as a  
655 case of recurrent AIS, which included LAS (n=40), SVS (n=57), CES (n=11), and transient  
656 ischemic attack (TIA, n=20). Samples with information on the first onset date and follow-up  
657 of under 30 days were excluded; AIS cases with recurrence (n=174) were set as the case  
658 group, and AIS cases without recurrence (n=1,153) remained in the control group in the  
659 testing sample.

660

### 661 **Quality control and imputation process of BBJ1 data**

662 We removed variants with call rates <0.99, samples with call rates <0.98, non-East Asian  
663 samples, and sex-discordant samples. We used 939 samples whose genotypes were analyzed  
664 using whole-genome sequencing (WGS); we added an additional quality control based on the  
665 concordance rate between the genotyping array and WGS. We excluded variants with  
666 concordance rates <99.5% or non-reference discordance rates  $\geq 0.5\%$  and Hardy-Weinberg  
667 equilibrium (HWE) ( $p < 1e-6$ ). The 10 principal components (PCs) were calculated by

668 applying additional quality control (QC) to the BBJ1 genotyped data. We removed samples  
669 from close relatives (King's cutoff  $>0.0884$ ), and 24 long LD regions,<sup>54</sup> including the MHC  
670 region (chr6, position 25,000,000-35,000,000), and  $MAF < 0.01$ . We pruned (PLINK2  
671 parameters: `--indep-pairwise 200 50 0.20`) and finally used 92,231–92,303 variants to  
672 conduct projection and calculate the first 10 PCs depending on a 10-fold sample set of the  
673 90% BBJ1 dataset.

674 Subsequently, the datasets were phased (Eagle v2.4.1) and imputed (Minimac4 v1.0.2) using  
675 the developed panel.<sup>55</sup> We further conducted quality control to remove variants with minor  
676 allele counts  $< 10$ , close relatives (King cutoff  $>0.0884$ ), and imputation r-square  $< 0.8$ .

677

#### 678 **Quality control and imputation process for BBJ2 data**

679 We removed samples with no age/sex information, sex discrepancy, call rates  $< 0.98$ ,  
680 heterozygosity rates with  $SD > 4$  or  $< -4$ , from duplicate or twins ( $\pi\text{-hat} \geq 0.75$ ), and from  
681 non-East Asian subjects. We then removed variants with a call rate  $< 0.99$ , duplicate SNPs,  
682 heterozygous count  $< 5$ , HWE ( $p < 1e-6$ ), and allele frequency discrepancies (gap from 1000  
683 genomes EAS  $> 0.16$ ). A total of 41,929 samples and 525,239 variants were analyzed.

684 We applied additional quality control to the BBJ2 genotyped data to calculate the 10 PCs. We  
685 removed variants in 24 long LD regions,<sup>54</sup> pruned them (PLINK2 parameters: `--indep-`  
686 `pairwise 200 50 0.05`), extracted close relatives (King cut-off  $>0.0884$ ), and used 69,068  
687 variants to calculate the first 10 PCs.

688 We removed variants of the imputation r-squared  $< 0.3$  after phasing (Eagle v2.4.1) and  
689 imputing (Minimac4 v1.0.2) the developed panel.<sup>55</sup> We used a lower r-square threshold for  
690 BBJ2 to reduce the number of variants unmatched with BBJ1.

691

#### 692 **Polygenic risk score parameters at the derivation**



693 Pruning and threshold used a total of 1,224 parameter combinations of three stricter  
694 imputation r-squared score thresholds {0.8, 0.9, and 0.95}, four base sizes of the clumping  
695 window {50, 100, 200, and 500}, six squared correlations of clumping {0.01, 0.05, 0.2, 0.5,  
696 0.8, and 0.95}, and 17 p-value threshold {1e-8, 3e-8, 1e-7, 3e-7, 1e-6, 3e-6, 1e-5, 3e-5, 1e-4,  
697 3e-4, 1e-3, 3e-3, 0.01, 0.03, 0.1, 0.3, and 1}. We used clumping windows and divided the  
698 base size by the squared correlation of clumping.<sup>56-59</sup> The following default parameters were  
699 used for LDpred2: three heritability {0.7, 1, and 1.4}  $\times h^2_{LDSC}$ , where  $h^2_{LDSC}$  is the heritability  
700 estimate from the constrained LD score regression,<sup>52</sup> 21  $\rho$  estimates {equally spaced on a log  
701 scale between 1e-5 and 1}, and sparse or not. The following default parameters were used for  
702 Lassosum2: 10 values of  $s$  {0.1, 0.2, 0.3, 0.4, 0.5, 0.6, 0.7, 0.8, 0.9, and 1.0} and 20 values of  
703  $\lambda$  {equally spaced on a log scale between 0.1 and 0.001}. Regarding PRS-CS and PRS-CSx,  
704 we used slightly more extended parameters: phi {1e-7, 1e-6, 1e-5, 1e-4, 1e-3, 0.01, 0.1, 1,  
705 and auto}, than the default parameters {1e-4, 1e-3, 0.01, 0.1, 1, and auto}, because the  
706 optimized parameter in the initial trials using our dataset was the smallest (phi=1e-4) in the  
707 default range. Other parameters were set to default values (a=1, b=0.5).<sup>41,42</sup>

708

### 709 **Linkage disequilibrium (LD) reference**

710 We used the EAS superpopulation of the 1000 Genomes panel (n=504) as a LD reference for  
711 P+T clumping. For Ldpred2, Lassosum2, PRS-CS, and PRS-CSx models, we restricted our  
712 use of external LD reference panels to the HapMap 3 variants, which were also constructed  
713 from 1000 Genomes EAS. HapMap 3 variant restriction resulted in 898,456, 898,456,  
714 985,440, and 1,076,835 variants of Ldpred2, Lassosum2, PRS-CS, and PRS-CSx,  
715 respectively. To use PRS-CSx for the EUR, we used the EUR superpopulation of the 1000  
716 Genomes panel and its HapMap3 variants (1,016,745 variants).

717

## 718 **Genome wide association study summary statistics for metaGRS construction**

719 MetaGRS was developed following a previous study<sup>14</sup> and included nine binary and eight  
720 quantitative traits. The nine binary traits were SVS, LAS, CES, myocardial infarction (MI),  
721 stable angina pectoris (SAP), unstable angina pectoris (AP), atrial fibrillation (AF), diabetes  
722 (DM), and ever smoking (SM) from the BBJ1 dataset. Subsequently, we conducted GWAS.  
723 The number of cases and controls is listed in Table S15. Summary statistics were obtained  
724 from the jMorp website (<https://jmorp.megabank.tohoku.ac.jp>) and were used for eight  
725 quantitative traits—body mass index (BMI), height (HE), systolic blood pressure (SBP),  
726 diastolic blood pressure (DBP), total cholesterol (TC), triglyceride (TG), high-density  
727 lipoprotein (HDL), and low-density lipoprotein (LDL) from the Tohoku Medical Megabank  
728 Project (ToMMo; 22,033 to 47,056 samples).<sup>60</sup>

729

## 730 **Polygenic risk score calculation from other milestone studies**

731 We obtained effect weights from the PGS catalog (PGS000665 and PGS002725 of  
732 <https://www.pgscatalog.org> for PRS<sub>32</sub> and iPGS<sub>EAS</sub>, respectively) and for PRS<sub>89</sub> from the  
733 supplementary tables.<sup>18</sup> We used variants that matched with the BBJ2 dataset (imputation r-  
734 squared > 0.3). The unmatched variants in PRS<sub>32</sub> and PRS<sub>89</sub> included proxy variants that  
735 showed the highest r-squared values with the index variants only from an r-squared value  
736 greater than 0.3. The r-squared values were calculated using the plink --r2 command<sup>35</sup> with  
737 the 1000 Genome EAS as a reference.

738

739 **Supplementary Notes**

740

741 **Characteristics of the PRS methods during validation**

742 The following characteristics of each method were observed while testing several  
743 parameters: the best mean incremental  $R^2$  of 0.0038 was observed for the P + T method when  
744 we liberalized the p-value threshold to 1 and clumped  $r^2 > 0.8$ , whereas it was below 0.001  
745 when we used a low p-value threshold ( $< 10^{-8}$ , Table S5). For LDpred2,  $\rho$  values higher than  
746 0.001 showed good performance (mean incremental  $R^2$  was 0.0038 for  $\rho$  values  $\geq 0.001$   
747 compared to 0.0016 for  $\rho$  values  $< 0.001$ ), while heritability estimates and sparse parameters  
748 made less difference (Table S6). For Lassosum2, the closer the value of parameter “s” is to 1,  
749 the higher the prediction accuracy, but it wasn’t the case at exactly 1. Larger lambda  
750 parameters correlate with greater accuracy (mean incremental  $R^2$  was between 0.0025 to  
751 0.0039). However, the accuracy sharply decreases (mean incremental  $R^2 < 0.001$ ) if the value  
752 is too small ( $< 0.01$ ). The prediction performance was maximized when the parameters were  
753  $s=0.9$  and  $\lambda=0.0038$  (Table S7). High and low phi values resulted in low performance  
754 for PRS-CS (mean incremental  $R^2$  was 0.0041 for  $\phi=10^{-3}$ ,  $10^{-4}$ , and  $10^{-5}$  compared to  
755 0.0029 for other phi parameters; Table S8). Meanwhile, PRS-CSx was relatively consistent  
756 regardless of the phi values (mean incremental  $R^2$  was 0.0032 for  $\phi=10^{-3}$ ,  $10^{-4}$ , and  $10^{-5}$   
757 compared to 0.0028 for other phi parameters; Table S9).

758 The performance of the PRS-CS ( $R^2=0.00441$ ) was comparable to that of LDpred2  
759 ( $R^2=0.00443$ ) in the validation analysis. Low validation predictability (incremental  $R^2 <$   
760 0.001) was observed when we restricted the p-value threshold in the P+T method to genome-  
761 wide significance ( $p < 5 \times 10^{-8}$ ). PRS-CSx improves cross-population polygenic prediction by  
762 integrating GWAS summary statistics from other populations;<sup>61–65</sup> however, we could not  
763 reproduce this result in our current study using PRS-CSx. Our results demonstrate the

764 importance of using Bayesian methods of high-dimensional techniques in variable selection  
765 and shrinkage estimation considering LD (such as LDpred2 and PRS-CS) to predict AIS and  
766 recurrent AIS.

767

768

769 **Supplementary Figures**

770

771 **Figure S1. Genome-wide association study (GWAS) in derivation samples**

We conducted stroke GWAS using 90% of BBJ 1<sup>st</sup> cohort data as the derivation sample, using Firth logistic regression and PLINK (v.2.0) for each 10-fold cross-validation identification. a. Quantile-Quantile plot, b. Manhattan plot, and c. genome-wide significant ( $p < 5e-8$ ) loci of each fold. Abbreviations: Chr = chromosome.

10-fold cross-validation identification

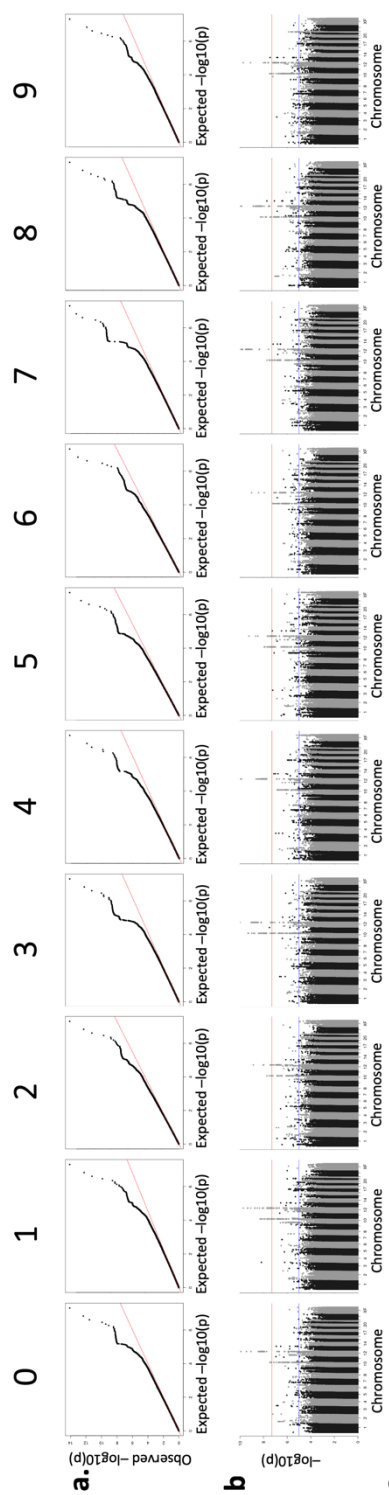

|        |                                     |  |  |  |  |  |  |  |  |  |  |  |  |  |  |  |  |  |  |
|--------|-------------------------------------|--|--|--|--|--|--|--|--|--|--|--|--|--|--|--|--|--|--|
| Chr.3  |                                     |  |  |  |  |  |  |  |  |  |  |  |  |  |  |  |  |  |  |
| Chr.10 | SH3PYXD2A                           |  |  |  |  |  |  |  |  |  |  |  |  |  |  |  |  |  |  |
| Chr.11 |                                     |  |  |  |  |  |  |  |  |  |  |  |  |  |  |  |  |  |  |
| Chr.12 | CGDC63<br>MYL2<br>CUX2<br>LINC02356 |  |  |  |  |  |  |  |  |  |  |  |  |  |  |  |  |  |  |
| Chr.13 |                                     |  |  |  |  |  |  |  |  |  |  |  |  |  |  |  |  |  |  |

772

773

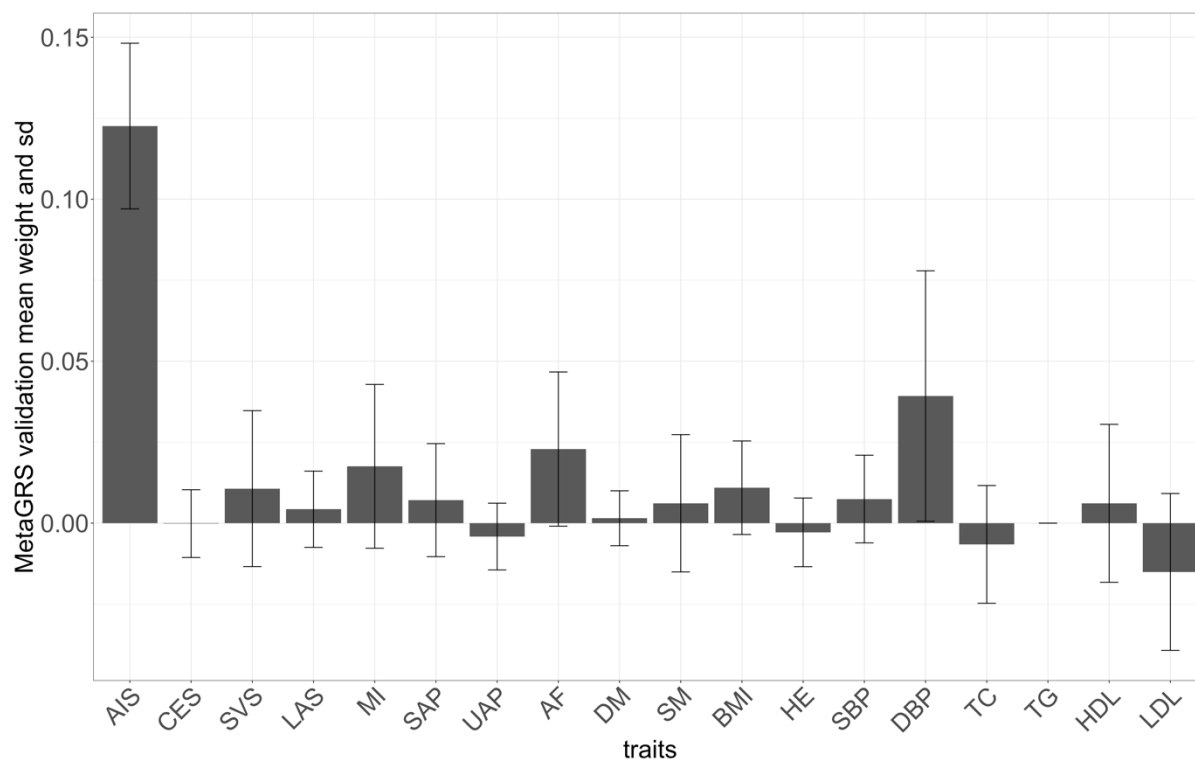

774

775

776 **Figure S2. Elastic net weight**

777 The mean weight of 10-fold elastic net regression as determined by “glmnet” in the  
778 validation sample. The X-axis shows the AS and the 17 binary and quantitative traits. Error  
779 bars represent standard deviations.

780 Abbreviations: AIS, all ischemic stroke; SVS, small vessel stroke; LAS, large artery stroke;  
781 CES, cardioembolic stroke; MI, myocardial infarction; SAP, stable angina pectoris; UAP,  
782 unstable angina pectoris; AF, atrial fibrillation; DM, diabetes; SM, smoking; BMI, body mass  
783 index; HE, height; SBP, systolic blood pressure; DBP, diastolic blood pressure; TC, total  
784 cholesterol; TG, triglyceride; HCL, high-density lipoprotein; LDL, low-density lipoprotein;  
785 SD, standard deviation.

786

787

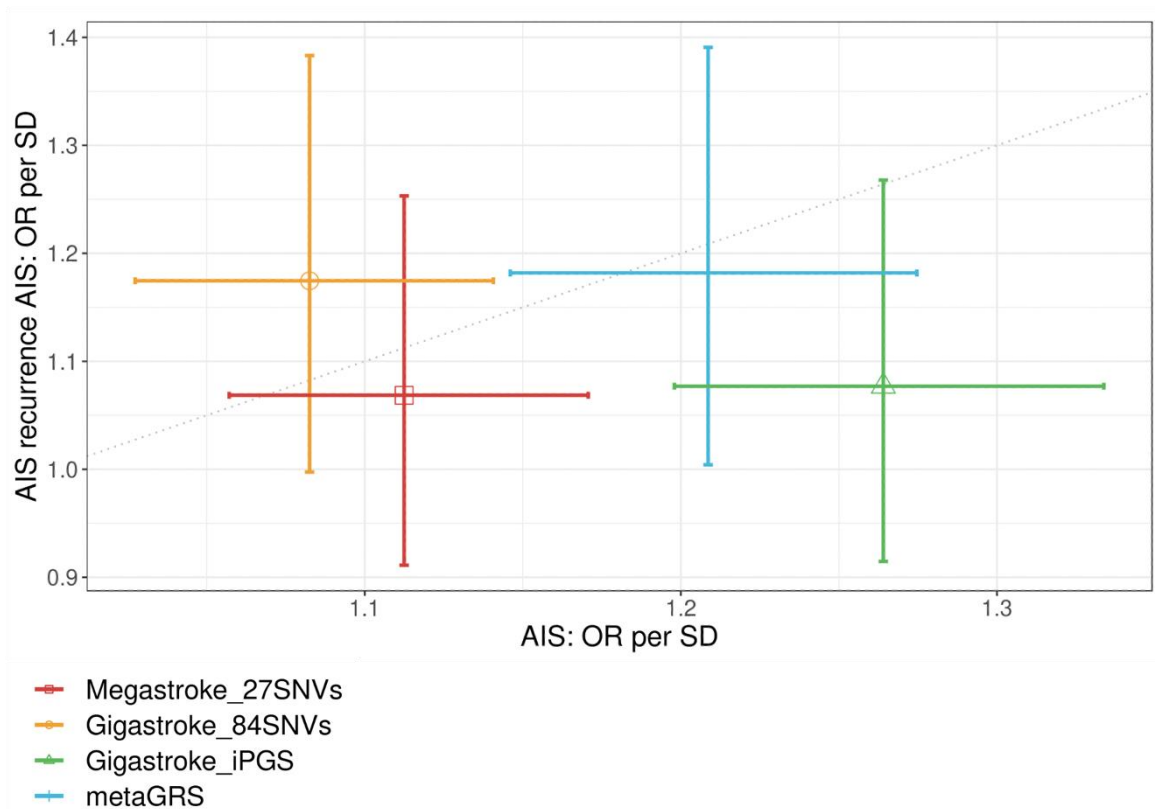

788

789

790 **Figure S3. Odds ratio per SD to predict AIS and AIS recurrence**

791 Odds ratio per standard deviation by metaGRS and three publicly available PRS in the  
792 independent test set of AIS (case=1, 470, control=40,459) and AIS recurrence case-control  
793 set (case=174, control=1,153). Age, sex, the first 10 PCs, and seven risk factors were  
794 adjusted. Error bars represent 95% confidence intervals. The dotted line represents the point  
795 at which the ORs per SD of AIS and AIS recurrence were equal. Abbreviations: OR, odds  
796 ratio; AIS, all ischemic stroke; PRS, polygenic risk score; PC, principal component; SD,  
797 standard deviation.

798



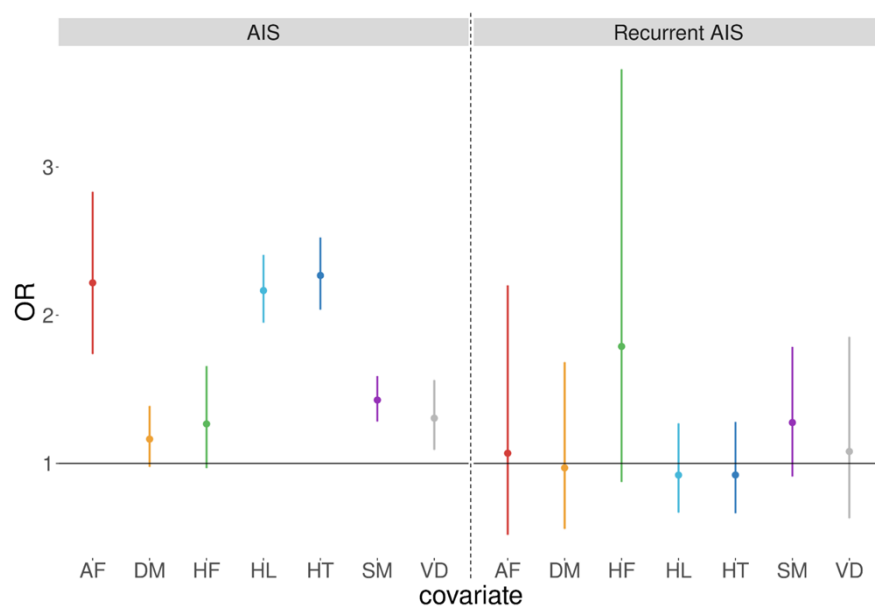

799

800

801 **Figure S4. Association between seven comorbidities and AIS/AIS recurrence**

802 The Y-axis shows the odds ratio per standard deviation (SD) and 95% confidence interval  
803 (CI) of the seven risk factors (six clinical comorbidities and smoking) in the BBJ 2<sup>nd</sup> cohort.

804 In our dataset, we used HT defined as SBP>140 mmHg, DBP>90 mmHg, or hypertension  
805 history, DM inclusive of type 1 diabetes and other diabetes, SM as a current smoker at the  
806 time of registration, VD representing myocardial infarction, arteriosclerosis obliterans, stable  
807 angina pectoris, unstable angina pectoris, and AF inclusive of atrial flutter. We used the status  
808 at the time of registration and history of these comorbidities.

809 Abbreviations: HT, hypertension; HL, hyperlipidemia; DM, diabetes; SM, smoking; VD,  
810 vascular disease; HF, congestive heart failure; AF, atrial fibrillation.

811

812

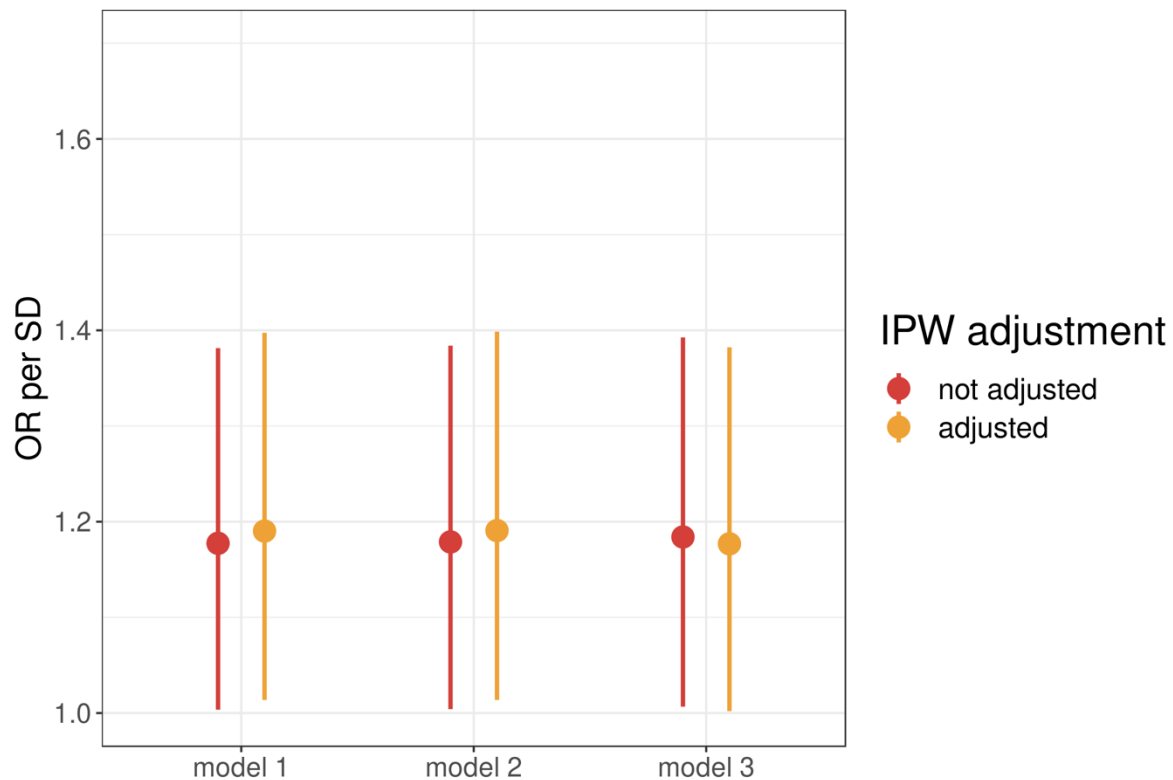

813

814 **Figure S5. Association between metaGRS and AIS recurrence in patients with or**  
815 **without IPW adjustment**

816 The y-axis shows the odds ratio per SD and the 95% confidence interval for predicting  
817 recurrent AIS. Model 1: age and sex; model 2: age, sex, and seven risk factors; model 3: age,  
818 sex, the first 10 principal components (PCs), and seven risk factors. The color represents  
819 whether the inverse probability weight (IPW) is adjusted. We applied logistic regression  
820 using variables as covariates when the IPW was not adjusted. We replaced 14 missing data  
821 on the smoking status to mean values.

822

823 **Supplementary Tables**

824 In separate spreadsheets S1-15

825

826

827

828 **Consortium authors**

829

830 **BioBank Japan**

831 Koichi Matsuda<sup>1,2</sup>, Yuji Yamanashi<sup>3</sup>, Yoichi Furukawa<sup>4</sup>, Takayuki Morisaki<sup>5</sup>, Yoshinori  
832 Murakami<sup>6</sup>, Yoichiro Kamatani<sup>2,7</sup>, Kaori Muto<sup>8</sup>, Akiko Nagai<sup>8</sup>, Wataru Obara<sup>9</sup>, Ken Yamaji<sup>10</sup>,  
833 Kazuhisa Takahashi<sup>11</sup>, Satoshi Asai<sup>12,13</sup>, Yasuo Takahashi<sup>13</sup>, Takao Suzuki<sup>14</sup>, Nobuaki  
834 Sinozaki<sup>14</sup>, Hiroki Yamaguchi<sup>15</sup>, Shiro Minami<sup>16</sup>, Shigeo Murayama<sup>17</sup>, Kozo Yoshimori<sup>18</sup>,  
835 Satoshi Nagayama<sup>19</sup>, Daisuke Obata<sup>20</sup>, Masahiko Higashiyama<sup>21</sup>, Akihide Masumoto<sup>22</sup>,  
836 Yukihiro Koretsune<sup>23</sup>

837

838 <sup>1</sup>Laboratory of Genome Technology, Human Genome Center, Institute of Medical Science,  
839 The University of Tokyo, Tokyo, Japan.

840 <sup>2</sup>Laboratory of Clinical Genome Sequencing, Graduate School of Frontier Sciences, The  
841 University of Tokyo, Tokyo, Japan.

842 <sup>3</sup>Division of Genetics, The Institute of Medical Science, The University of Tokyo, Tokyo,  
843 Japan.

844 <sup>4</sup>Division of Clinical Genome Research, Institute of Medical Science, The University of  
845 Tokyo, Tokyo, Japan.

846 <sup>5</sup>Division of Molecular Pathology IMSUT Hospital, Department of Internal Medicine Project  
847 Division of Genomic Medicine and Disease Prevention The Institute of Medical Science The  
848 University of Tokyo, Tokyo, Japan.

849 <sup>6</sup>Department of Cancer Biology, Institute of Medical Science, The University of Tokyo,  
850 Tokyo, Japan.

851 <sup>7</sup>Laboratory of Complex Trait Genomics, Graduate School of Frontier Sciences, The  
852 University of Tokyo, Tokyo, Japan.

853 <sup>8</sup>Department of Public Policy, Institute of Medical Science, The University of Tokyo, Tokyo,  
854 Japan.

855 <sup>9</sup>Department of Urology, Iwate Medical University, Iwate, Japan.

856 <sup>10</sup>Department of Internal Medicine and Rheumatology, Juntendo University Graduate School  
857 of Medicine, Tokyo, Japan.

858 <sup>11</sup>Department of Respiratory Medicine, Juntendo University Graduate School of Medicine,  
859 Tokyo, Japan.

860 <sup>12</sup>Division of Pharmacology, Department of Biomedical Science, Nihon University School of  
861 Medicine, Tokyo, Japan.

862 <sup>13</sup>Division of Genomic Epidemiology and Clinical Trials, Clinical Trials Research Center,  
863 Nihon University. School of Medicine, Tokyo, Japan.

864 <sup>14</sup>Tokushukai Group, Tokyo, Japan.

865 <sup>15</sup>Hiroki Yamaguchi. Department of Hematology, Nippon Medical School, Tokyo, Japan.

866 <sup>16</sup>Department of Bioregulation, Nippon Medical School, Kawasaki, Japan.

867 <sup>17</sup>Shigeo Murayama. Tokyo Metropolitan Geriatric Hospital and Institute of Gerontology,  
868 Tokyo, Japan.

869 <sup>18</sup>Fukujuji Hospital, Japan Anti-Tuberculosis Association, Tokyo, Japan.

870 <sup>19</sup>The Cancer Institute Hospital of the Japanese Foundation for Cancer Research, Tokyo,  
871 Japan.

872 <sup>20</sup>Center for Clinical Research and Advanced Medicine, Shiga University of Medical  
873 Science, Shiga, Japan.

874 <sup>21</sup>Masahiko Higashiyama. Department of General Thoracic Surgery, Osaka International  
875 Cancer Institute, Osaka, Japan.

876 <sup>22</sup>Iizuka Hospital, Fukuoka, Japan.

877 <sup>23</sup>National Hospital Organization Osaka National Hospital, Osaka, Japan.

878

879

880

881 **MEGASTROKE CONSORTIUM**

882

883 Rainer Malik<sup>1</sup>, Ganesh Chauhan<sup>2</sup>, Matthew Traylor<sup>3</sup>, Muralidharan  
884 Sargurupremraj<sup>4,5</sup>, Yukinori Okada<sup>6,7,8</sup>, Aniket Mishra<sup>4,5</sup>, Loes Rutten-Jacobs<sup>3</sup>,  
885 Anne-Katrin Giese<sup>9</sup>, Sander W van der Laan<sup>10</sup>, Solveig Gretarsdottir<sup>11</sup>, Christopher  
886 D Anderson<sup>12,13,14</sup>, Michael Chong<sup>15</sup>, Hieab HH Adams<sup>16,17</sup>, Tetsuro Ago<sup>18</sup>, Peter  
887 Almgren<sup>19</sup>, Philippe Amouyel<sup>20,21</sup>, Hakan Ay<sup>13,22</sup>, Traci M Bartz<sup>23</sup>, Oscar R  
888 Benavente<sup>24</sup>, Steve Bevan<sup>25</sup>, Giorgio B Boncoraglio<sup>26</sup>, Robert D Brown, Jr.<sup>27</sup>,  
889 Adam S Butterworth<sup>28,29</sup>, Caty Carrera<sup>30,31</sup>, Cara L Carty<sup>32,33</sup>, Daniel I  
890 Chasman<sup>34,35</sup>, Wei-Min Chen<sup>36</sup>, John W Cole<sup>37</sup>, Adolfo Correa<sup>38</sup>, Ioana  
891 Cotlarciuc<sup>39</sup>, Carlos Cruchaga<sup>40,41</sup>, John Danesh<sup>28,42,43,44</sup>, Paul IW de Bakker<sup>45,46</sup>,  
892 Anita L DeStefano<sup>47,48</sup>, Marcel den Hoed<sup>49</sup>, Qing Duan<sup>50</sup>, Stefan T Engelter<sup>51,52</sup>,  
893 Guido J Falcone<sup>53,54</sup>, Rebecca F Gottesman<sup>55</sup>, Raji P Grewal<sup>56</sup>, Vilmundur  
894 Gudnason<sup>57,58</sup>, Stefan Gustafsson<sup>59</sup>, Jeffrey Haessler<sup>60</sup>, Tamara B Harris<sup>61</sup>, Ahamad  
895 Hassan<sup>62</sup>, Aki S Havulinna<sup>63,64</sup>, Susan R Heckbert<sup>65</sup>, Elizabeth G Holliday<sup>66,67</sup>,  
896 George Howard<sup>68</sup>, Fang-Chi Hsu<sup>69</sup>, Hyacinth I Hyacinth<sup>70</sup>, M Arfan Ikram<sup>16</sup>, Erik  
897 Ingelsson<sup>71,72</sup>, Marguerite R Irvin<sup>73</sup>, Xueqiu Jian<sup>74</sup>, Jordi Jiménez-Conde<sup>75</sup>, Julie A  
898 Johnson<sup>76,77</sup>, J Wouter Jukema<sup>78</sup>, Masahiro Kanai<sup>6,7,79</sup>, Keith L Keene<sup>80,81</sup>, Brett M  
899 Kissela<sup>82</sup>, Dawn O Kleindorfer<sup>82</sup>, Charles Kooperberg<sup>60</sup>, Michiaki Kubo<sup>83</sup>, Leslie A  
900 Lange<sup>84</sup>, Carl D Langefeld<sup>85</sup>, Claudia Langenberg<sup>86</sup>, Lenore J Launer<sup>87</sup>, Jin-Moo  
901 Lee<sup>88</sup>, Robin Lemmens<sup>89,90</sup>, Didier Leys<sup>91</sup>, Cathryn M Lewis<sup>92,93</sup>, Wei-Yu Lin<sup>28,94</sup>,  
902 Arne G Lindgren<sup>95,96</sup>, Erik Lorentzen<sup>97</sup>, Patrik K Magnusson<sup>98</sup>, Jane Maguire<sup>99</sup>,  
903 Ani Manichaikul<sup>36</sup>, Patrick F McArdle<sup>100</sup>, James F Meschia<sup>101</sup>, Braxton D  
904 Mitchell<sup>100,102</sup>, Thomas H Mosley<sup>103,104</sup>, Michael A Nalls<sup>105,106</sup>, Toshiharu  
905 Ninomiya<sup>107</sup>, Martin J O'Donnell<sup>15,108</sup>, Bruce M Psaty<sup>109,110,111,112</sup>, Sara L Pulit<sup>45,113</sup>,  
906 Kristiina Rannikmäe<sup>114,115</sup>, Alexander P Reiner<sup>65,116</sup>, Kathryn M Rexrode<sup>117</sup>,  
907 Kenneth Rice<sup>118</sup>, Stephen S Rich<sup>36</sup>, Paul M Ridker<sup>34,35</sup>, Natalia S Rost<sup>9,13</sup>, Peter M  
908 Rothwell<sup>119</sup>, Jerome I Rotter<sup>120,121</sup>, Tatjana Rundek<sup>122</sup>, Ralph L Sacco<sup>122</sup>, Saori  
909 Sakaue<sup>7,123</sup>, Michele M Sale<sup>124</sup>, Veikko Salomaa<sup>63</sup>, Bishwa R Sapkota<sup>125</sup>, Reinhold  
910 Schmidt<sup>126</sup>, Carsten O Schmidt<sup>127</sup>, Ulf Schminke<sup>128</sup>, Pankaj Sharma<sup>39</sup>, Agnieszka  
911 Slowik<sup>129</sup>, Cathie LM Sudlow<sup>114,115</sup>, Christian Tanislav<sup>130</sup>, Turgut Tatlisumak<sup>131,132</sup>,  
912 Kent D Taylor<sup>120,121</sup>, Vincent NS Thijs<sup>133,134</sup>, Gudmar Thorleifsson<sup>11</sup>, Unnur  
913 Thorsteinsdottir<sup>11</sup>, Steffen Tiedt<sup>1</sup>, Stella Trompet<sup>135</sup>, Christophe Tzourio<sup>5,136,137</sup>,  
914 Cornelia M van Duijn<sup>138,139</sup>, Matthew Walters<sup>140</sup>, Nicholas J Wareham<sup>86</sup>, Sylvia  
915 Wassertheil-Smoller<sup>141</sup>, James G Wilson<sup>142</sup>, Kerri L Wiggins<sup>109</sup>, Qiong Yang<sup>47</sup>,  
916 Salim Yusuf<sup>15</sup>, Najaf Amin<sup>16</sup>, Hugo S Aparicio<sup>48,185</sup>, Donna K Arnett<sup>186</sup>, John  
917 Attia<sup>187</sup>, Alexa S Beiser<sup>47,48</sup>, Claudine Berr<sup>188</sup>, Julie E Buring<sup>34,35</sup>, Mariana  
918 Bustamante<sup>189</sup>, Valeria Caso<sup>190</sup>, Yu-Ching Cheng<sup>191</sup>, Seung Hoan Choi<sup>48,192</sup>,  
919 Ayesha Chowhan<sup>48,185</sup>, Natalia Cullell<sup>31</sup>, Jean-François Dartigues<sup>193,194</sup>, Hossein  
920 Delavaran<sup>95,96</sup>, Pilar Delgado<sup>195</sup>, Marcus Dörr<sup>196,197</sup>, Gunnar Engström<sup>19</sup>, Ian  
921 Ford<sup>198</sup>, Wander S Gurpreet<sup>199</sup>, Anders Hamsten<sup>200,201</sup>, Laura Heitsch<sup>202</sup>, Atsushi  
922 Hozawa<sup>203</sup>, Laura Ibanez<sup>204</sup>, Andreea Ilinca<sup>95,96</sup>, Martin Ingelsson<sup>205</sup>, Motoki  
923 Iwasaki<sup>206</sup>, Rebecca D Jackson<sup>207</sup>, Katarina Jood<sup>208</sup>, Pekka Jousilahti<sup>63</sup>, Sara  
924 Kaffashian<sup>4,5</sup>, Lalit Kalra<sup>209</sup>, Masahiro Kamouchi<sup>210</sup>, Takanari Kitazono<sup>211</sup>, Olafur  
925 Kjartansson<sup>212</sup>, Manja Kloss<sup>213</sup>, Peter J Koudstaal<sup>214</sup>, Jerzy Krupinski<sup>215</sup>, Daniel L  
926 Labovitz<sup>216</sup>, Cathy C Laurie<sup>118</sup>, Christopher R Levi<sup>217</sup>, Linxin Li<sup>218</sup>, Lars Lind<sup>219</sup>,

927 Cecilia M Lindgren<sup>220,221</sup>, Vasileios Lioutas<sup>48,222</sup>, Yong Mei Liu<sup>223</sup>, Oscar L  
928 Lopez<sup>224</sup>, Hirata Makoto<sup>225</sup>, Nicolas Martinez-Majander<sup>172</sup>, Koichi Matsuda<sup>225</sup>,  
929 Naoko Minegishi<sup>203</sup>, Joan Montaner<sup>226</sup>, Andrew P Morris<sup>227,228</sup>, Elena Muiño<sup>31</sup>,  
930 Martina Müller-Nurasyid<sup>229,230,231</sup>, Bo Norrving<sup>95,96</sup>, Soichi Ogishima<sup>203</sup>, Eugenio  
931 A Parati<sup>232</sup>, Leema Reddy Peddareddygari<sup>56</sup>, Nancy L Pedersen<sup>98,233</sup>, Joanna  
932 Pera<sup>129</sup>, Markus Perola<sup>63,234</sup>, Alessandro Pezzini<sup>235</sup>, Silvana Pileggi<sup>236</sup>, Raquel  
933 Rabionet<sup>237</sup>, Iolanda Riba-Llena<sup>30</sup>, Marta Ribasés<sup>238</sup>, Jose R Romero<sup>48,185</sup>, Jaime  
934 Roquer<sup>239,240</sup>, Anthony G Rudd<sup>241,242</sup>, Antti-Pekka Sarin<sup>243,244</sup>, Ralhan Sarju<sup>199</sup>,  
935 Chloe Sarnowski<sup>47,48</sup>, Makoto Sasaki<sup>245</sup>, Claudia L Satizabal<sup>48,185</sup>, Mamoru  
936 Satoh<sup>245</sup>, Naveed Sattar<sup>246</sup>, Norie Sawada<sup>206</sup>, Gerli Sibolt<sup>172</sup>, Ásgeir Sigurdsson<sup>247</sup>,  
937 Albert Smith<sup>248</sup>, Kenji Sobue<sup>245</sup>, Carolina Soriano-Tárraga<sup>240</sup>, Tara Stanne<sup>249</sup>, O  
938 Colin Stine<sup>250</sup>, David J Stott<sup>251</sup>, Konstantin Strauch<sup>229,252</sup>, Takako Takai<sup>203</sup>, Hideo  
939 Tanaka<sup>253,254</sup>, Kozo Tanno<sup>245</sup>, Alexander Teumer<sup>255</sup>, Liisa Tomppo<sup>172</sup>, Nuria P  
940 Torres-Aguila<sup>31</sup>, Emmanuel Touze<sup>256,257</sup>, Shoichiro Tsugane<sup>206</sup>, Andre G  
941 Uitterlinden<sup>258</sup>, Einar M Valdimarsson<sup>259</sup>, Sven J van der Lee<sup>16</sup>, Henry Völzke<sup>255</sup>,  
942 Kenji Wakai<sup>253</sup>, David Weir<sup>260</sup>, Stephen R Williams<sup>261</sup>, Charles DA Wolfe<sup>241,242</sup>,  
943 Quenna Wong<sup>118</sup>, Huichun Xu<sup>191</sup>, Taiki Yamaji<sup>206</sup>, Dharambir K Sanghera<sup>125,169,170</sup>,  
944 Olle Melander<sup>19</sup>, Christina Jern<sup>171</sup>, Daniel Strbian<sup>172,173</sup>, Israel Fernandez-  
945 Cadenas<sup>31,30</sup>, W T Longstreth, Jr<sup>65,174</sup>, Arndt Rolfs<sup>175</sup>, Jun Hata<sup>107</sup>, Daniel Woo<sup>82</sup>,  
946 Jonathan Rosand<sup>12,13,14</sup>, Guillaume Pare<sup>15</sup>, Jemma C Hopewell<sup>176</sup>, Danish  
947 Saleheen<sup>177</sup>, Kari Stefansson<sup>11,178</sup>, Bradford B Worrall<sup>179</sup>, Steven J Kittner<sup>37</sup>,  
948 Sudha Seshadri<sup>48,180</sup>, Myriam Fornage<sup>74,181</sup>, Hugh S Markus<sup>3</sup>, Joanna MM  
949 Howson<sup>28</sup>, Yoichiro Kamatani<sup>6,182</sup>, Stephanie Debette<sup>4,5</sup>, Martin Dichgans<sup>1,183,184</sup>

950  
951 <sup>1</sup>Institute for Stroke and Dementia Research (ISD), University Hospital, LMU  
952 Munich, Munich, Germany

953 <sup>2</sup>Centre for Brain Research, Indian Institute of Science, Bangalore, India

954 <sup>3</sup>Stroke Research Group, Division of Clinical Neurosciences, University of  
955 Cambridge, UK

956 <sup>4</sup>INSERM U1219 Bordeaux Population Health Research Center, Bordeaux, France

957 <sup>5</sup>University of Bordeaux, Bordeaux, France

958 <sup>6</sup>Laboratory for Statistical Analysis, RIKEN Center for Integrative Medical  
959 Sciences, Yokohama, Japan

960 <sup>7</sup>Department of Statistical Genetics, Osaka University Graduate School of  
961 Medicine, Osaka, Japan

962 <sup>8</sup>Laboratory of Statistical Immunology, Immunology Frontier Research Center  
963 (WPI-IFReC), Osaka University, Suita, Japan.

964 <sup>9</sup>Department of Neurology, Massachusetts General Hospital, Harvard Medical  
965 School, Boston, MA, USA

966 <sup>10</sup>Laboratory of Experimental Cardiology, Division of Heart and Lungs, University  
967 Medical Center Utrecht, University of Utrecht, Utrecht, Netherlands

968 <sup>11</sup>deCODE genetics/AMGEN inc, Reykjavik, Iceland

969 <sup>12</sup>Center for Genomic Medicine, Massachusetts General Hospital (MGH), Boston,  
970 MA, USA

971 <sup>13</sup>J. Philip Kistler Stroke Research Center, Department of Neurology, MGH,  
972 Boston, MA, USA

973 <sup>14</sup>Program in Medical and Population Genetics, Broad Institute, Cambridge, MA,  
974 USA

975 <sup>15</sup>Population Health Research Institute, McMaster University, Hamilton, Canada

- 976 <sup>16</sup>Department of Epidemiology, Erasmus University Medical Center, Rotterdam,  
977 Netherlands
- 978 <sup>17</sup>Department of Radiology and Nuclear Medicine, Erasmus University Medical  
979 Center, Rotterdam, Netherlands
- 980 <sup>18</sup>Department of Medicine and Clinical Science, Graduate School of Medical  
981 Sciences, Kyushu University, Fukuoka, Japan
- 982 <sup>19</sup>Department of Clinical Sciences, Lund University, Malmö, Sweden
- 983 <sup>20</sup>Univ. Lille, Inserm, Institut Pasteur de Lille, LabEx DISTALZ-UMR1167, Risk  
984 factors and molecular determinants of aging-related diseases, F-59000 Lille,  
985 France
- 986 <sup>21</sup>Centre Hosp. Univ Lille, Epidemiology and Public Health Department, F-59000  
987 Lille, France
- 988 <sup>22</sup>AA Martinos Center for Biomedical Imaging, Department of Radiology,  
989 Massachusetts General Hospital, Harvard Medical School, Boston, MA, USA
- 990 <sup>23</sup>Cardiovascular Health Research Unit, Departments of Biostatistics and Medicine,  
991 University of Washington, Seattle, WA, USA
- 992 <sup>24</sup>Division of Neurology, Faculty of Medicine, Brain Research Center, University  
993 of British Columbia, Vancouver, Canada
- 994 <sup>25</sup>School of Life Science, University of Lincoln, Lincoln, UK
- 995 <sup>26</sup>Department of Cerebrovascular Diseases, Fondazione IRCCS Istituto  
996 Neurologico "Carlo Besta", Milano, Italy
- 997 <sup>27</sup>Department of Neurology, Mayo Clinic Rochester, Rochester, MN, USA
- 998 <sup>28</sup>MRC/BHF Cardiovascular Epidemiology Unit, Department of Public Health and  
999 Primary Care, University of Cambridge, Cambridge, UK
- 1000 <sup>29</sup>The National Institute for Health Research Blood and Transplant Research Unit  
1001 in Donor Health and Genomics, University of Cambridge, UK
- 1002 <sup>30</sup>Neurovascular Research Laboratory, Vall d'Hebron Institut of Research,  
1003 Neurology and Medicine Departments-Universitat Autònoma de Barcelona, Vall  
1004 d'Hebrón Hospital, Barcelona, Spain
- 1005 <sup>31</sup>Stroke Pharmacogenomics and Genetics, Fundacio Docència i Recerca  
1006 MutuaTerrassa, Terrassa, Spain
- 1007 <sup>32</sup>Children's Research Institute, Children's National Medical Center, Washington,  
1008 DC, USA
- 1009 <sup>33</sup>Center for Translational Science, George Washington University, Washington,  
1010 DC, USA
- 1011 <sup>34</sup>Division of Preventive Medicine, Brigham and Women's Hospital, Boston, MA,  
1012 USA
- 1013 <sup>35</sup>Harvard Medical School, Boston, MA, USA
- 1014 <sup>36</sup>Center for Public Health Genomics, Department of Public Health Sciences,  
1015 University of Virginia, Charlottesville, VA, USA
- 1016 <sup>37</sup>Department of Neurology, University of Maryland School of Medicine and  
1017 Baltimore VAMC, Baltimore, MD, USA
- 1018 <sup>38</sup>Departments of Medicine, Pediatrics and Population Health Science, University  
1019 of Mississippi Medical Center, Jackson, MS, USA
- 1020 <sup>39</sup>Institute of Cardiovascular Research, Royal Holloway University of London,  
1021 UK & Ashford and St Peters Hospital, Surrey UK
- 1022 <sup>40</sup>Department of Psychiatry, The Hope Center Program on Protein Aggregation and  
1023 Neurodegeneration (HPAN), Washington University, School of Medicine, St. Louis,  
1024 MO, USA



1025 <sup>41</sup>Department of Developmental Biology, Washington University School of  
1026 Medicine, St. Louis, MO, USA  
1027 <sup>42</sup>NIHR Blood and Transplant Research Unit in Donor Health and Genomics,  
1028 Department of Public Health and Primary Care, University of Cambridge,  
1029 Cambridge, UK  
1030 <sup>43</sup>Wellcome Trust Sanger Institute, Wellcome Trust Genome Campus,  
1031 Hinxton, Cambridge, UK  
1032 <sup>44</sup>British Heart Foundation, Cambridge Centre of Excellence, Department of  
1033 Medicine, University of Cambridge, Cambridge, UK  
1034 <sup>45</sup>Department of Medical Genetics, University Medical Center Utrecht, Utrecht,  
1035 Netherlands  
1036 <sup>46</sup>Department of Epidemiology, Julius Center for Health Sciences and Primary  
1037 Care, University Medical Center Utrecht, Utrecht, Netherlands  
1038 <sup>47</sup>Boston University School of Public Health, Boston, MA, USA  
1039 <sup>48</sup>Framingham Heart Study, Framingham, MA, USA  
1040 <sup>49</sup>Department of Immunology, Genetics and Pathology and Science for Life  
1041 Laboratory, Uppsala University, Uppsala, Sweden  
1042 <sup>50</sup>Department of Genetics, University of North Carolina, Chapel Hill, NC, USA  
1043 <sup>51</sup>Department of Neurology and Stroke Center, Basel University Hospital,  
1044 Switzerland  
1045 <sup>52</sup>Neurorehabilitation Unit, University and University Center for Medicine of  
1046 Aging and Rehabilitation Basel, Felix Platter Hospital, Basel, Switzerland  
1047 <sup>53</sup>Department of Neurology, Yale University School of Medicine, New Haven, CT,  
1048 USA  
1049 <sup>54</sup>Program in Medical and Population Genetics, The Broad Institute of Harvard and  
1050 MIT, Cambridge, MA, USA  
1051 <sup>55</sup>Department of Neurology, Johns Hopkins University School of Medicine,  
1052 Baltimore, MD, USA  
1053 <sup>56</sup>Neuroscience Institute, SF Medical Center, Trenton, NJ, USA  
1054 <sup>57</sup>Icelandic Heart Association Research Institute, Kopavogur, Iceland  
1055 <sup>58</sup>University of Iceland, Faculty of Medicine, Reykjavik, Iceland  
1056 <sup>59</sup>Department of Medical Sciences, Molecular Epidemiology and Science for Life  
1057 Laboratory, Uppsala University, Uppsala, Sweden  
1058 <sup>60</sup>Division of Public Health Sciences, Fred Hutchinson Cancer Research Center,  
1059 Seattle, WA, USA  
1060 <sup>61</sup>Laboratory of Epidemiology and Population Science, National Institute on Aging,  
1061 National Institutes of Health, Bethesda, MD, USA  
1062 <sup>62</sup>Department of Neurology, Leeds General Infirmary, Leeds Teaching Hospitals  
1063 NHS Trust, Leeds, UK  
1064 <sup>63</sup>National Institute for Health and Welfare, Helsinki, Finland  
1065 <sup>64</sup>FIMM - Institute for Molecular Medicine Finland, Helsinki, Finland  
1066 <sup>65</sup>Department of Epidemiology, University of Washington, Seattle, WA, USA  
1067 <sup>66</sup>Public Health Stream, Hunter Medical Research Institute, New Lambton,  
1068 Australia  
1069 <sup>67</sup>Faculty of Health and Medicine, University of Newcastle, Newcastle, Australia  
1070 <sup>68</sup>School of Public Health, University of Alabama at Birmingham, Birmingham, AL,  
1071 USA  
1072 <sup>69</sup>Department of Biostatistical Sciences, Wake Forest School of Medicine,  
1073 Winston-Salem, NC, USA

1074 <sup>70</sup>Aflac Cancer and Blood Disorder Center, Department of Pediatrics, Emory  
1075 University School of Medicine, Atlanta, GA, USA  
1076 <sup>71</sup>Department of Medicine, Division of Cardiovascular Medicine, Stanford  
1077 University School of Medicine, CA, USA  
1078 <sup>72</sup>Department of Medical Sciences, Molecular Epidemiology and Science for Life  
1079 Laboratory, Uppsala University, Uppsala, Sweden  
1080 <sup>73</sup>Epidemiology, School of Public Health, University of Alabama at Birmingham,  
1081 USA  
1082 <sup>74</sup>Brown Foundation Institute of Molecular Medicine, University of Texas Health  
1083 Science Center at Houston, Houston, TX, USA  
1084 <sup>75</sup>Neurovascular Research Group (NEUVAS), Neurology Department, Institut  
1085 Hospital del Mar d'Investigació Mèdica, Universitat Autònoma de Barcelona,  
1086 Barcelona, Spain  
1087 <sup>76</sup>Department of Pharmacotherapy and Translational Research and Center for  
1088 Pharmacogenomics, University of Florida, College of Pharmacy, Gainesville, FL,  
1089 USA  
1090 <sup>77</sup>Division of Cardiovascular Medicine, College of Medicine, University of Florida,  
1091 Gainesville, FL, USA  
1092 <sup>78</sup>Department of Cardiology, Leiden University Medical Center, Leiden, the  
1093 Netherlands  
1094 <sup>79</sup>Program in Bioinformatics and Integrative Genomics, Harvard Medical School,  
1095 Boston, MA, USA  
1096 <sup>80</sup>Department of Biology, East Carolina University, Greenville, NC, USA  
1097 <sup>81</sup>Center for Health Disparities, East Carolina University, Greenville, NC, USA  
1098 <sup>82</sup>University of Cincinnati College of Medicine, Cincinnati, OH, USA  
1099 <sup>83</sup>RIKEN Center for Integrative Medical Sciences, Yokohama, Japan  
1100 <sup>84</sup>Department of Medicine, University of Colorado Denver, Anschutz Medical  
1101 Campus, Aurora, CO, USA  
1102 <sup>85</sup>Center for Public Health Genomics and Department of Biostatistical Sciences,  
1103 Wake Forest School of Medicine, Winston-Salem, NC, USA  
1104 <sup>86</sup>MRC Epidemiology Unit, University of Cambridge School of Clinical Medicine,  
1105 Institute of Metabolic Science, Cambridge Biomedical Campus, Cambridge, UK  
1106 <sup>87</sup>Intramural Research Program, National Institute on Aging, National Institutes of  
1107 Health, Bethesda, MD, USA  
1108 <sup>88</sup>Department of Neurology, Radiology, and Biomedical Engineering, Washington  
1109 University School of Medicine, St. Louis, MO, USA  
1110 <sup>89</sup>KU Leuven – University of Leuven, Department of  
1111 Neurosciences, Experimental Neurology, Leuven, Belgium  
1112 <sup>90</sup>VIB Center for Brain & Disease Research, University Hospitals Leuven,  
1113 Department of Neurology, Leuven, Belgium  
1114 <sup>91</sup>Univ.-Lille, INSERM U 1171. CHU Lille. Lille, France  
1115 <sup>92</sup>Department of Medical and Molecular Genetics, King's College London, London,  
1116 UK  
1117 <sup>93</sup>SGDP Centre, Institute of Psychiatry, Psychology & Neuroscience, King's  
1118 College London, London, UK  
1119 <sup>94</sup>Northern Institute for Cancer Research, Paul O'Gorman Building, Newcastle  
1120 University, Newcastle, UK  
1121 <sup>95</sup>Department of Clinical Sciences Lund, Neurology, Lund University, Lund,  
1122 Sweden

- 1123 <sup>96</sup>Department of Neurology and Rehabilitation Medicine, Skåne University  
1124 Hospital, Lund, Sweden
- 1125 <sup>97</sup>Bioinformatics Core Facility, University of Gothenburg, Gothenburg, Sweden
- 1126 <sup>98</sup>Department of Medical Epidemiology and Biostatistics, Karolinska Institutet,  
1127 Stockholm, Sweden
- 1128 <sup>99</sup>University of Technology Sydney, Faculty of Health, Ultimo, Australia
- 1129 <sup>100</sup>Department of Medicine, University of Maryland School of Medicine, MD, USA
- 1130 <sup>101</sup>Department of Neurology, Mayo Clinic, Jacksonville, FL, USA
- 1131 <sup>102</sup>Geriatrics Research and Education Clinical Center, Baltimore Veterans  
1132 Administration Medical Center, Baltimore, MD, USA
- 1133 <sup>103</sup>Division of Geriatrics, School of Medicine, University of Mississippi Medical  
1134 Center, Jackson, MS, USA
- 1135 <sup>104</sup>Memory Impairment and Neurodegenerative Dementia Center, University of  
1136 Mississippi Medical Center, Jackson, MS, USA
- 1137 <sup>105</sup>Laboratory of Neurogenetics, National Institute on Aging, National Institutes of  
1138 Health, Bethesda, MD, USA
- 1139 <sup>106</sup>Data Tecnica International, Glen Echo MD, USA
- 1140 <sup>107</sup>Department of Epidemiology and Public Health, Graduate School of Medical  
1141 Sciences, Kyushu University, Fukuoka, Japan
- 1142 <sup>108</sup>Clinical Research Facility, Department of Medicine, NUI Galway, Galway,  
1143 Ireland
- 1144 <sup>109</sup>Cardiovascular Health Research Unit, Department of Medicine, University of  
1145 Washington, Seattle, WA, USA
- 1146 <sup>110</sup>Department of Epidemiology, University of Washington, Seattle, WA, USA
- 1147 <sup>111</sup>Department of Health Services, University of Washington, Seattle, WA, USA
- 1148 <sup>112</sup>Kaiser Permanente Washington Health Research Institute, Seattle, WA, USA
- 1149 <sup>113</sup>Brain Center Rudolf Magnus, Department of Neurology, University Medical  
1150 Center Utrecht, Utrecht, The Netherlands
- 1151 <sup>114</sup>Usher Institute of Population Health Sciences and Informatics, University of  
1152 Edinburgh, Edinburgh, UK
- 1153 <sup>115</sup>Centre for Clinical Brain Sciences, University of Edinburgh, Edinburgh, UK
- 1154 <sup>116</sup>Fred Hutchinson Cancer Research Center, University of Washington, Seattle,  
1155 WA, USA
- 1156 <sup>117</sup>Department of Medicine, Brigham and Women's Hospital, Boston, MA, USA
- 1157 <sup>118</sup>Department of Biostatistics, University of Washington, Seattle, WA, USA
- 1158 <sup>119</sup>Nuffield Department of Clinical Neurosciences, University of Oxford, UK
- 1159 <sup>120</sup>Institute for Translational Genomics and Population Sciences, Los Angeles  
1160 Biomedical Research Institute at Harbor-UCLA Medical Center, Torrance, CA,  
1161 USA
- 1162 <sup>121</sup>Division of Genomic Outcomes, Department of Pediatrics, Harbor-UCLA  
1163 Medical Center, Torrance, CA, USA
- 1164 <sup>122</sup>Department of Neurology, Miller School of Medicine, University of Miami,  
1165 Miami, FL, USA
- 1166 <sup>123</sup>Department of Allergy and Rheumatology, Graduate School of Medicine, the  
1167 University of Tokyo, Tokyo, Japan
- 1168 <sup>124</sup>Center for Public Health Genomics, University of Virginia, Charlottesville, VA,  
1169 USA
- 1170 <sup>125</sup>Department of Pediatrics, College of Medicine, University of Oklahoma Health  
1171 Sciences Center, Oklahoma City, OK, USA
- 1172 <sup>126</sup>Department of Neurology, Medical University of Graz, Graz, Austria

1173 <sup>127</sup>University Medicine Greifswald, Institute for Community Medicine, SHIP-KEF,  
1174 Greifswald, Germany  
1175 <sup>128</sup>University Medicine Greifswald, Department of Neurology, Greifswald,  
1176 Germany  
1177 <sup>129</sup>Department of Neurology, Jagiellonian University, Krakow, Poland  
1178 <sup>130</sup>Department of Neurology, Justus Liebig University, Giessen, Germany  
1179 <sup>131</sup>Department of Clinical Neurosciences/Neurology, Institute of Neuroscience and  
1180 Physiology, Sahlgrenska Academy at University of Gothenburg, Gothenburg,  
1181 Sweden  
1182 <sup>132</sup>Sahlgrenska University Hospital, Gothenburg, Sweden  
1183 <sup>133</sup>Stroke Division, Florey Institute of Neuroscience and Mental Health, University  
1184 of Melbourne, Heidelberg, Australia  
1185 <sup>134</sup>Austin Health, Department of Neurology, Heidelberg, Australia  
1186 <sup>135</sup>Department of Internal Medicine, Section Gerontology and Geriatrics, Leiden  
1187 University Medical Center, Leiden, the Netherlands  
1188 <sup>136</sup>INSERM U1219, Bordeaux, France  
1189 <sup>137</sup>Department of Public Health, Bordeaux University Hospital, Bordeaux, France  
1190 <sup>138</sup>Genetic Epidemiology Unit, Department of Epidemiology, Erasmus University  
1191 Medical Center Rotterdam, Netherlands  
1192 <sup>139</sup>Center for Medical Systems Biology, Leiden, Netherlands  
1193 <sup>140</sup>School of Medicine, Dentistry and Nursing at the University of Glasgow,  
1194 Glasgow, UK  
1195 <sup>141</sup>Department of Epidemiology and Population Health, Albert Einstein College of  
1196 Medicine, NY, USA  
1197 <sup>142</sup>Department of Physiology and Biophysics, University of Mississippi Medical  
1198 Center, Jackson, MS, USA  
1199 <sup>143</sup>A full list of members and affiliations appears in the Supplementary Note  
1200 <sup>144</sup>Department of Human Genetics, McGill University, Montreal, Canada  
1201 <sup>145</sup>Department of Pathophysiology, Institute of Biomedicine and Translation  
1202 Medicine, University of Tartu, Tartu, Estonia  
1203 <sup>146</sup>Department of Cardiac Surgery, Tartu University Hospital, Tartu, Estonia  
1204 <sup>147</sup>Clinical Gene Networks AB, Stockholm, Sweden  
1205 <sup>148</sup>Department of Genetics and Genomic Sciences, The Icahn Institute for  
1206 Genomics and Multiscale Biology Icahn School of Medicine at Mount Sinai, New  
1207 York, NY, USA  
1208 <sup>149</sup>Department of Pathophysiology, Institute of Biomedicine and Translation  
1209 Medicine, University of Tartu, Biomeedikum, Tartu, Estonia  
1210 <sup>150</sup>Integrated Cardio Metabolic Centre, Department of Medicine, Karolinska  
1211 Institutet, Karolinska Universitetssjukhuset, Huddinge, Sweden.  
1212 <sup>151</sup>Clinical Gene Networks AB, Stockholm, Sweden  
1213 <sup>152</sup>Sorbonne Universités, UPMC Univ. Paris 06, INSERM, UMR\_S 1166, Team  
1214 Genomics & Pathophysiology of Cardiovascular Diseases, Paris, France  
1215 <sup>153</sup>ICAN Institute for Cardiometabolism and Nutrition, Paris, France  
1216 <sup>154</sup>Department of Biomedical Engineering, University of Virginia, Charlottesville,  
1217 VA, USA  
1218 <sup>155</sup>Group Health Research Institute, Group Health Cooperative, Seattle, WA, USA  
1219 <sup>156</sup>Seattle Epidemiologic Research and Information Center, VA Office of Research  
1220 and Development, Seattle, WA, USA  
1221 <sup>157</sup>Cardiovascular Research Center, Massachusetts General Hospital, Boston, MA,  
1222 USA

- 1223 <sup>158</sup>Department of Medical Research, Bærum Hospital, Vestre Viken Hospital Trust,  
1224 Gjettem, Norway
- 1225 <sup>159</sup>Saw Swee Hock School of Public Health, National University of Singapore and  
1226 National University Health System, Singapore
- 1227 <sup>160</sup>National Heart and Lung Institute, Imperial College London, London, UK
- 1228 <sup>161</sup>Department of Gene Diagnostics and Therapeutics, Research Institute, National  
1229 Center for Global Health and Medicine, Tokyo, Japan
- 1230 <sup>162</sup>Department of Epidemiology, Tulane University School of Public Health and  
1231 Tropical Medicine, New Orleans, LA, USA
- 1232 <sup>163</sup>Department of Cardiology, University Medical Center Groningen, University of  
1233 Groningen, Netherlands
- 1234 <sup>164</sup>MRC-PHE Centre for Environment and Health, School of Public Health,  
1235 Department of Epidemiology and Biostatistics, Imperial College London, London,  
1236 UK
- 1237 <sup>165</sup>Department of Epidemiology and Biostatistics, Imperial College London,  
1238 London, UK
- 1239 <sup>166</sup>Department of Cardiology, Ealing Hospital NHS Trust, Southall, UK
- 1240 <sup>167</sup>National Heart, Lung and Blood Research Institute, Division of Intramural  
1241 Research, Population Sciences Branch, Framingham, MA, USA
- 1242 <sup>168</sup>A full list of members and affiliations appears at the end of the manuscript
- 1243 <sup>169</sup>Department of Pharmaceutical Sciences, College of Pharmacy, University of  
1244 Oklahoma Health Sciences Center, Oklahoma City, OK, USA
- 1245 <sup>170</sup>Oklahoma Center for Neuroscience, Oklahoma City, OK, USA
- 1246 <sup>171</sup>Department of Pathology and Genetics, Institute of Biomedicine, The  
1247 Sahlgrenska Academy at University of Gothenburg, Gothenburg, Sweden
- 1248 <sup>172</sup>Department of Neurology, Helsinki University Hospital, Helsinki, Finland
- 1249 <sup>173</sup>Clinical Neurosciences, Neurology, University of Helsinki, Helsinki, Finland
- 1250 <sup>174</sup>Department of Neurology, University of Washington, Seattle, WA, USA
- 1251 <sup>175</sup>Albrecht Kossel Institute, University Clinic of Rostock, Rostock, Germany
- 1252 <sup>176</sup>Clinical Trial Service Unit and Epidemiological Studies Unit, Nuffield  
1253 Department of Population Health, University of Oxford, Oxford, UK
- 1254 <sup>177</sup>Department of Genetics, Perelman School of Medicine, University of  
1255 Pennsylvania, PA, USA
- 1256 <sup>178</sup>Faculty of Medicine, University of Iceland, Reykjavik, Iceland
- 1257 <sup>179</sup>Departments of Neurology and Public Health Sciences, University of Virginia  
1258 School of Medicine, Charlottesville, VA, USA
- 1259 <sup>180</sup>Department of Neurology, Boston University School of Medicine, Boston, MA,  
1260 USA
- 1261 <sup>181</sup>Human Genetics Center, University of Texas Health Science Center at Houston,  
1262 Houston, TX, USA
- 1263 <sup>182</sup>Center for Genomic Medicine, Kyoto University Graduate School of Medicine,  
1264 Kyoto, Japan
- 1265 <sup>183</sup>Munich Cluster for Systems Neurology (SyNergy), Munich, Germany
- 1266 <sup>184</sup>German Center for Neurodegenerative Diseases (DZNE), Munich, Germany
- 1267 <sup>185</sup>Boston University School of Medicine, Boston, MA, USA
- 1268 <sup>186</sup>University of Kentucky College of Public Health, Lexington, KY, USA
- 1269 <sup>187</sup>University of Newcastle and Hunter Medical Research Institute, New Lambton,  
1270 Australia
- 1271 <sup>188</sup>Univ. Montpellier, Inserm, U1061, Montpellier, France
- 1272 <sup>189</sup>Centre for Research in Environmental Epidemiology, Barcelona, Spain



1273 <sup>190</sup>Department of Neurology, Università degli Studi di Perugia, Umbria, Italy  
1274 <sup>191</sup>Department of Medicine, University of Maryland School of Medicine, Baltimore,  
1275 MD, USA  
1276 <sup>192</sup>Broad Institute, Cambridge, MA, USA  
1277 <sup>193</sup>Univ. Bordeaux, Inserm, Bordeaux Population Health Research Center, UMR  
1278 1219, Bordeaux, France  
1279 <sup>194</sup>Bordeaux University Hospital, Department of Neurology, Memory Clinic,  
1280 Bordeaux, France  
1281 <sup>195</sup>Neurovascular Research Laboratory. Vall d'Hebron Institut of Research,  
1282 Neurology and Medicine Departments-Universitat Autònoma de Barcelona. Vall  
1283 d'Hebrón Hospital, Barcelona, Spain  
1284 <sup>196</sup>University Medicine Greifswald, Department of Internal Medicine B,  
1285 Greifswald, Germany  
1286 <sup>197</sup>DZHK, Greifswald, Germany  
1287 <sup>198</sup>Robertson Center for Biostatistics, University of Glasgow, Glasgow, UK  
1288 <sup>199</sup>Hero DMC Heart Institute, Dayanand Medical College & Hospital, Ludhiana,  
1289 India  
1290 <sup>200</sup>Atherosclerosis Research Unit, Department of Medicine Solna, Karolinska  
1291 Institutet, Stockholm, Sweden  
1292 <sup>201</sup>Karolinska Institutet, Stockholm, Sweden  
1293 <sup>202</sup>Division of Emergency Medicine, and Department of Neurology, Washington  
1294 University School of Medicine, St. Louis, MO, USA  
1295 <sup>203</sup>Tohoku Medical Megabank Organization, Sendai, Japan  
1296 <sup>204</sup>Department of Psychiatry, Washington University School of Medicine, St. Louis,  
1297 MO, USA  
1298 <sup>205</sup>Department of Public Health and Caring Sciences / Geriatrics, Uppsala  
1299 University, Uppsala, Sweden  
1300 <sup>206</sup>Epidemiology and Prevention Group, Center for Public Health Sciences,  
1301 National Cancer Center, Tokyo, Japan  
1302 <sup>207</sup>Department of Internal Medicine and the Center for Clinical and Translational  
1303 Science, The Ohio State University, Columbus, OH, USA  
1304 <sup>208</sup>Institute of Neuroscience and Physiology, the Sahlgrenska Academy at  
1305 University of Gothenburg, Goteborg, Sweden  
1306 <sup>209</sup>Department of Basic and Clinical Neurosciences, King's College London,  
1307 London, UK  
1308 <sup>210</sup>Department of Health Care Administration and Management, Graduate School  
1309 of Medical Sciences, Kyushu University, Japan  
1310 <sup>211</sup>Department of Medicine and Clinical Science, Graduate School of Medical  
1311 Sciences, Kyushu University, Japan  
1312 <sup>212</sup>Landspítali National University Hospital, Departments of Neurology &  
1313 Radiology, Reykjavik, Iceland  
1314 <sup>213</sup>Department of Neurology, Heidelberg University Hospital, Germany  
1315 <sup>214</sup>Department of Neurology, Erasmus University Medical Center  
1316 <sup>215</sup>Hospital Universitari Mutua Terrassa, Terrassa (Barcelona), Spain  
1317 <sup>216</sup>Albert Einstein College of Medicine, Montefiore Medical Center, New York,  
1318 NY, USA  
1319 <sup>217</sup>John Hunter Hospital, Hunter Medical Research Institute and University of  
1320 Newcastle, Newcastle, NSW, Australia  
1321 <sup>218</sup>Centre for Prevention of Stroke and Dementia, Nuffield Department of Clinical  
1322 Neurosciences, University of Oxford, UK

1323 <sup>219</sup>Department of Medical Sciences, Uppsala University, Uppsala, Sweden  
1324 <sup>220</sup>Genetic and Genomic Epidemiology Unit, Wellcome Trust Centre for Human  
1325 Genetics, University of Oxford, Oxford, UK  
1326 <sup>221</sup>The Wellcome Trust Centre for Human Genetics, Oxford, UK  
1327 <sup>222</sup>Beth Israel Deaconess Medical Center, Boston, MA, USA  
1328 <sup>223</sup>Wake Forest School of Medicine, Wake Forest, NC, USA  
1329 <sup>224</sup>Department of Neurology, University of Pittsburgh, Pittsburgh, PA, USA  
1330 <sup>225</sup>BioBank Japan, Laboratory of Clinical Sequencing, Department of  
1331 Computational biology and medical Sciences, Graduate school of Frontier Sciences,  
1332 The University of Tokyo, Tokyo, Japan  
1333 <sup>226</sup>Neurovascular Research Laboratory, Vall d'Hebron Institut of Research,  
1334 Neurology and Medicine Departments-Universitat Autònoma de Barcelona. Vall  
1335 d'Hebrón Hospital, Barcelona, Spain  
1336 <sup>227</sup>Department of Biostatistics, University of Liverpool, Liverpool, UK  
1337 <sup>228</sup>Wellcome Trust Centre for Human Genetics, University of Oxford, Oxford, UK  
1338 <sup>229</sup>Institute of Genetic Epidemiology, Helmholtz Zentrum München - German  
1339 Research Center for Environmental Health, Neuherberg, Germany  
1340 <sup>230</sup>Department of Medicine I, Ludwig-Maximilians-Universität, Munich, Germany  
1341 <sup>231</sup>DZHK (German Centre for Cardiovascular Research), partner site Munich Heart  
1342 Alliance, Munich, Germany  
1343 <sup>232</sup>Department of Cerebrovascular Diseases, Fondazione IRCCS Istituto  
1344 Neurologico "Carlo Besta", Milano, Italy  
1345 <sup>233</sup>Karolinska Institutet, MEB, Stockholm, Sweden  
1346 <sup>234</sup>University of Tartu, Estonian Genome Center, Tartu, Estonia, Tartu, Estonia  
1347 <sup>235</sup>Department of Clinical and Experimental Sciences, Neurology Clinic,  
1348 University of Brescia, Italy  
1349 <sup>236</sup>Translational Genomics Unit, Department of Oncology, IRCCS Istituto di  
1350 Ricerche Farmacologiche Mario Negri, Milano, Italy  
1351 <sup>237</sup>Department of Genetics, Microbiology and Statistics, University of Barcelona,  
1352 Barcelona, Spain  
1353 <sup>238</sup>Psychiatric Genetics Unit, Group of Psychiatry, Mental Health and Addictions,  
1354 Vall d'Hebron Research Institute (VHIR), Universitat Autònoma de Barcelona,  
1355 Biomedical Network Research Centre on Mental Health (CIBERSAM), Barcelona,  
1356 Spain  
1357 <sup>239</sup>Department of Neurology, IMIM-Hospital del Mar, and Universitat Autònoma  
1358 de Barcelona, Spain  
1359 <sup>240</sup>IMIM (Hospital del Mar Medical Research Institute), Barcelona, Spain  
1360 <sup>241</sup>National Institute for Health Research Comprehensive Biomedical Research  
1361 Centre, Guy's & St. Thomas' NHS Foundation Trust and King's College London,  
1362 London, UK  
1363 <sup>242</sup>Division of Health and Social Care Research, King's College London, London,  
1364 UK  
1365 <sup>243</sup>FIMM-Institute for Molecular Medicine Finland, Helsinki, Finland  
1366 <sup>244</sup>THL-National Institute for Health and Welfare, Helsinki, Finland  
1367 <sup>245</sup>Iwate Tohoku Medical Megabank Organization, Iwate Medical University, Iwate,  
1368 Japan  
1369 <sup>246</sup>BHF Glasgow Cardiovascular Research Centre, Faculty of Medicine, Glasgow,  
1370 UK  
1371 <sup>247</sup>deCODE Genetics/Amgen, Inc., Reykjavik, Iceland  
1372 <sup>248</sup>Icelandic Heart Association, Reykjavik, Iceland

1373 <sup>249</sup>Institute of Biomedicine, the Sahlgrenska Academy at University of Gothenburg,  
1374 Goteborg, Sweden  
1375 <sup>250</sup>Department of Epidemiology, University of Maryland School of Medicine,  
1376 Baltimore, MD, USA  
1377 <sup>251</sup>Institute of Cardiovascular and Medical Sciences, Faculty of Medicine,  
1378 University of Glasgow, Glasgow, UK  
1379 <sup>252</sup>Chair of Genetic Epidemiology, IBE, Faculty of Medicine, LMU Munich,  
1380 Germany  
1381 <sup>253</sup>Division of Epidemiology and Prevention, Aichi Cancer Center Research  
1382 Institute, Nagoya, Japan  
1383 <sup>254</sup>Department of Epidemiology, Nagoya University Graduate School of Medicine,  
1384 Nagoya, Japan  
1385 <sup>255</sup>University Medicine Greifswald, Institute for Community Medicine, SHIP-KEF,  
1386 Greifswald, Germany  
1387 <sup>256</sup>Department of Neurology, Caen University Hospital, Caen, France  
1388 <sup>257</sup>University of Caen Normandy, Caen, France  
1389 <sup>258</sup>Department of Internal Medicine, Erasmus University Medical Center,  
1390 Rotterdam, Netherlands  
1391 <sup>259</sup>Landspítali University Hospital, Reykjavik, Iceland  
1392 <sup>260</sup>Survey Research Center, University of Michigan, Ann Arbor, MI, USA  
1393 <sup>261</sup>University of Virginia Department of Neurology, Charlottesville, VA, USA  
1394  
1395
